# Supplementary material for: Prevalence of, and risk factors for, HIV, hepatitis B and C infections among men who inject image and performance enhancing drugs: a cross-sectional study
Source: PubMed Central journal article supplement — BMJ Open. 2013 Sep 10;3(9):e003207. doi: 10.1136/bmjopen-2013-003207 (PMC3773656; doi:10.1136/bmjopen-2013-003207), 2013-09-10
Supplement: bmjopen-2013-003207.draft_revisions.pdf [file bmjopen-2013-003207.draft_revisions.pdf]

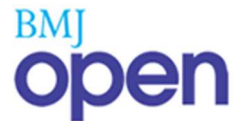

**Prevalence of, and risk factors for, HIV, hepatitis B and C infections among men who inject image and performance enhancing drugs.**

|                                 |                                                                                                                                                                                                                                                                                                                                                                                                                                                                                                                                                                                                                                                                                                                                                                                                                                                                                                                                                                                                                                                                                                                                                                                 |
|---------------------------------|---------------------------------------------------------------------------------------------------------------------------------------------------------------------------------------------------------------------------------------------------------------------------------------------------------------------------------------------------------------------------------------------------------------------------------------------------------------------------------------------------------------------------------------------------------------------------------------------------------------------------------------------------------------------------------------------------------------------------------------------------------------------------------------------------------------------------------------------------------------------------------------------------------------------------------------------------------------------------------------------------------------------------------------------------------------------------------------------------------------------------------------------------------------------------------|
| Journal:                        | <i>BMJ Open</i>                                                                                                                                                                                                                                                                                                                                                                                                                                                                                                                                                                                                                                                                                                                                                                                                                                                                                                                                                                                                                                                                                                                                                                 |
| Manuscript ID:                  | bmjopen-2013-003207                                                                                                                                                                                                                                                                                                                                                                                                                                                                                                                                                                                                                                                                                                                                                                                                                                                                                                                                                                                                                                                                                                                                                             |
| Article Type:                   | Research                                                                                                                                                                                                                                                                                                                                                                                                                                                                                                                                                                                                                                                                                                                                                                                                                                                                                                                                                                                                                                                                                                                                                                        |
| Date Submitted by the Author:   | 13-May-2013                                                                                                                                                                                                                                                                                                                                                                                                                                                                                                                                                                                                                                                                                                                                                                                                                                                                                                                                                                                                                                                                                                                                                                     |
| Complete List of Authors:       | <p>Hope, Vivian; Public Health England, Centre for Infectious Disease Surveillance and Control; London School of Hygiene &amp; Tropical Medicine, Centre for Research on Drugs &amp; Health Behaviour</p> <p>McVeigh, Jim; Liverpool John Moores University, Centre for Public Health, Marongiu, Andrea; Public Health England, Centre for Infectious Disease Surveillance and Control</p> <p>Evans-Brown, Michael; European Monitoring Centre for Drugs and Drug Addiction,</p> <p>Smith, Josie; Public Health Wales,</p> <p>Kimergaard, Andreas; Aarhus University, Department of Public Health</p> <p>Scroxford, Sara; Public Health England, Centre for Infectious Disease Surveillance and Control</p> <p>Beynon, Caryl; Liverpool John Moores University, Centre for Public Health</p> <p>Parry, John; Public Health England, Centre for Infectious Disease Surveillance and Control; London School of Hygiene &amp; Tropical Medicine, Centre for Research on Drugs &amp; Health Behaviour</p> <p>Bellis, Mark; Liverpool John Moores, Centre for Public Health</p> <p>Ncube, Fortune; Public Health England, Centre for Infectious Disease Surveillance and Control</p> |
| <b>Primary Subject Heading</b>: | HIV/AIDS                                                                                                                                                                                                                                                                                                                                                                                                                                                                                                                                                                                                                                                                                                                                                                                                                                                                                                                                                                                                                                                                                                                                                                        |
| Secondary Subject Heading:      | Public health, Epidemiology, Addiction, Infectious diseases                                                                                                                                                                                                                                                                                                                                                                                                                                                                                                                                                                                                                                                                                                                                                                                                                                                                                                                                                                                                                                                                                                                     |
| Keywords:                       | Injecting drug use, Prevalence, Image and performance enhancing drugs, HIV, Viral hepatitis                                                                                                                                                                                                                                                                                                                                                                                                                                                                                                                                                                                                                                                                                                                                                                                                                                                                                                                                                                                                                                                                                     |
|                                 |                                                                                                                                                                                                                                                                                                                                                                                                                                                                                                                                                                                                                                                                                                                                                                                                                                                                                                                                                                                                                                                                                                                                                                                 |

SCHOLARONE™  
Manuscripts

HIV and image & performance enhancing drug use.

1

**Prevalence of, and risk factors for, HIV, hepatitis B and C infections among men who inject image and performance enhancing drugs.**

Vivian D HOPE<sup>1,2</sup>, Jim MCVEIGH<sup>3</sup>, Andrea MARONGIU<sup>1</sup>, Michael EVANS-BROWN<sup>4</sup>,  
Josie SMITH<sup>5</sup>, Andreas KIMERGÅRD<sup>6</sup>, Sara CROXFORD<sup>1</sup>, Caryl M BEYNON<sup>3</sup>, John V  
PARRY<sup>1,2</sup>, Mark A BELLIS<sup>3</sup>, Fortune NCUBE<sup>1</sup>.

1. *Public Health England, 61 Colindale Avenue, London NW9 5EQ, United Kingdom*
2. *Centre for Research on Drugs and Health Behaviour, London School of Hygiene & Tropical Medicine, Keppel Street, London WC1E 7HT, United Kingdom*
3. *Centre for Public Health, Liverpool John Moores University, Liverpool, L3 2ET, United Kingdom*
4. *European Monitoring Centre for Drugs and Drug Addiction, Cais do Sodré, 1249–289 Lisbon, Portugal*
5. *Public Health Wales, Temple of Peace & Health, Cathays Park, Cardiff, CF10 3NW, United Kingdom*
6. *Department of Public Health, Aarhus University, Bartholins Allé 2, DK-8000, Aarhus C, Denmark*

*Address for Correspondence:*

Vivian Hope  
Centre for Infectious Disease Surveillance and Control  
Public Health England  
61 Colindale Avenue  
LONDON NW9 5EQ  
United Kingdom  
Tel: +44 (0) 20 8327 7930

**Key Words:** Injecting drug use; prevalence; image and performance enhancing drugs; HIV; viral hepatitis.

**Word Count Abstract:** 300

**Word Count Manuscript:** 3,403

HIV and image & performance enhancing drug use.

2

## Abstract

*Background/Objective:* People who inject drugs' vulnerability to infection is widely recognised; however, studies have rarely focused on users of image and performance enhancing drugs (IPEDs). IPEDs can be used to change appearance for aesthetic reasons, as well as to improve performance. Needle and syringe programme (NSP) use by IPED injectors has grown substantially in the United Kingdom. In response, this study assessed IPED injectors risk of blood-borne virus infection.

*Design/Setting/Participants:* A voluntary unlinked-anonymous survey recruited male IPED injectors through 19 NSPs. Participants completed a questionnaire and provided an oral-fluid sample.

*Results:* Of the 395 participants (median age 28 years), 36% had used IPEDs for <5 years. Anabolic steroids (86%), growth hormone (32%) and human chorionic gonadotropin (16%) were most frequently injected, with 88% injecting intramuscularly and 39% subcutaneously. Two-thirds also used IPEDs orally. Recent psychoactive drug use was common (46% cocaine, 12% amphetamine), 5% had ever injected a psychoactive drug, and 9% had shared injecting equipment. "Viagra/Cialis" was used by 7%; with 89% reporting anal/vaginal sex in the preceding year (20% had 5+ female-partners, 3% male-partners) with 13% always using condoms. Only 23% reported hepatitis B vaccine uptake, and diagnostic testing uptake was poor (31% HIV, 22% hepatitis C). Overall, 1.5% had HIV, 9% had antibodies to the hepatitis B core antigen (anti-HBc) and 5% to hepatitis C (anti-HCV). In multivariate analysis, having HIV was associated with: seeking advice from a sexual health clinic; having had an injection site abscess/wound, and having male-partners. After excluding those reporting male-partners or injecting psychoactive drugs, 0.8% had HIV, 8% anti-HBc, and 5% anti-HCV.

*Conclusions:* Previous prevalence studies had not found HIV among IPED injectors. HIV prevalence in this, the largest study of blood-borne viruses among IPED injectors, was

HIV and image & performance enhancing drug use.

3

similar to that among injectors of psychoactive drugs. Findings indicate a need for targeted interventions.

For peer review only

1  
2  
3  
4  
5  
6  
7  
8  
9  
10  
11  
12  
13  
14  
15  
16  
17  
18  
19  
20  
21  
22  
23  
24  
25  
26  
27  
28  
29  
30  
31  
32  
33  
34  
35  
36  
37  
38  
39  
40  
41  
42  
43  
44  
45  
46  
47  
48  
49  
50  
51  
52  
53  
54  
55  
56  
57  
58  
59  
60

HIV and image & performance enhancing drug use.

4

## Article summary

### Article focus:

- Over the last decade the number of men using needle and syringe programmes who report injecting image and performance enhancing drugs has risen in England and Wales; as a result there has been increased concern about the levels of blood-borne viral infections in this group. This study assessed the prevalence of HIV, hepatitis B and C, and the levels of related risk behaviours in this population.

### Key messages:

- The overall prevalence of HIV among men injecting image and performance enhancing drugs was similar to that among those injecting psychoactive drugs in England & Wales. Previous prevalence studies of people who inject image and performance enhancing drugs had not detected HIV.
- When the results of this study are compared to those of a previous study undertaken in England & Wales in the mid-1990s, they suggest that the prevalence of hepatitis B infection among injectors of image and performance enhancing drugs *might* have increased over time.
- Sexual risk behaviours and psychoactive drug use were common among injectors of image and performance enhancing drugs, and the sharing of injecting equipment was also reported. The uptake of diagnostic testing for blood borne-viral infections and the vaccine against hepatitis B were low.

### Strengths and limitations of this study:

- This study recruited image and performance enhancing drugs users through needle and syringe programmes. Injectors of these drugs not in contact with these services may have a different risk profile and levels of infection.
- Oral-fluid testing was used to detect antibodies to HIV, hepatitis B and C; however, tests on these samples for both anti-HCV and anti-HBc have reduced sensitivity.

HIV and image & performance enhancing drug use.

5

- This study is the largest of blood-borne viruses among men who inject image and performance enhancing drugs, however, the sample size still restricts its power. Consequently, caution is needed when attempting to generalise these findings.

For peer review only

HIV and image & performance enhancing drug use.

6

## INTRODUCTION

The vulnerability of people who inject drugs (PWID) to HIV and other infections is widely recognised; however, studies have focused on individuals who inject psychoactive drugs (such as opiates and stimulants) rather than those who inject drugs to enhance image and performance.[1,2,3,4] The number of injectors of image and performance enhancing drugs (IPEDs) in contact with needle and syringe programmes (NSPs) has grown substantially in the United Kingdom (UK);[5] and there has been increasing concern about the use of IPEDs and the associated harms in the UK and elsewhere.[3,5,6,7,8,9,10,11]

A range of illicit drugs can be injected with the aim of changing image and performance. These drugs range from tanning drugs, such as 'Melanotan-II',[12] to those used in body-building, such as human growth hormone.[3,13] The most commonly injected and studied IPEDs are anabolic steroids (AS).[3,5] IPEDs are taken both orally and by injection, with some predominantly injected and others taken only orally. Many users of these substances also take an array of different drugs.[3,5,14] The use, and particularly the injection of IPEDs has been associated with a range of harms including infections caused by bacteria[15,16,17,18,19] and blood borne viruses (BBVs).[6,20,21,22,23,24,25]

In England and Wales (E&W) surveillance of HIV and viral hepatitis among PWID is undertaken through an annual unlinked-anonymous survey[26,27] targeted at injectors of psychoactive drugs. A very small number of IPED injectors participated in this survey;[20] among the 149 sampled during the 1990s, 2% had antibodies to the hepatitis B core antigen (anti-HBc, a marker of having ever been infected with hepatitis B virus [HBV]) and none had antibodies to HIV (anti-HIV).[20] In a surveillance study of NSP clients in Australia, 1.6% (n=318) of those participating over a 10-year period reported steroid injection, with 10% having antibodies to hepatitis C virus (anti-HCV) and none

HIV and image & performance enhancing drug use.

7

1  
2  
3 anti-HIV.[21] Only one other survey of IPED injectors has collected biological samples;  
4  
5 this study purposively recruited 63 AS injectors in Victoria, Australia, and found 12% had  
6  
7 anti-HBc, 9.5% anti-HCV, and none anti-HIV.[6] A second Australian study found that  
8  
9 half of IPED users sampled had ever experienced an injection-related health problem,  
10  
11 with 6% having ever had an abscess.[8]  
12  
13

14  
15  
16 A number of other UK studies have recruited IPED injectors – principally AS injectors –  
17  
18 however, none of these collected biological samples. These studies were mostly small  
19  
20 (N<100), and typically recruited through gyms,[28,29,30,31,32,33] with two recruiting gay  
21  
22 men.[34,35] The prevalence of ever sharing injecting equipment in these studies ranged  
23  
24 from 0.3% to 6%,[20,28,29,30,32] but in one it was 20%.[33] The sharing of drug vials  
25  
26 was more common (2.4%[35]; 9.9%[34]; 23%[32]). Studies elsewhere have found similar  
27  
28 levels of equipment sharing.[6,8] IPED users also report using psychoactive drugs,  
29  
30 particularly stimulants, though the reported injection of psychoactive drugs is  
31  
32 rare.[6,8,28,35,36] IPED users also tend to have more sexual partners than their  
33  
34 comparison groups,[20,28] report risky sexual behaviours,[20,32] and low levels of  
35  
36 condom use;[28,34] suggesting an elevated risk for HIV infection through sexual activity.  
37  
38  
39

40  
41 During 2010 and 2011, in response to the increasing concerns about IPED use, a  
42  
43 targeted survey was undertaken as part of the on-going unlinked-anonymous survey of  
44  
45 PWID. The aim of this sub-survey was to assess the current levels of infection and risk  
46  
47 among IPED injectors. As far as we are aware this is the largest, and the first study  
48  
49 outside of Australia, to purposively recruit IPED injectors to measure the prevalence of  
50  
51 anti-HIV, anti-HBc and anti-HCV.  
52  
53  
54  
55  
56  
57  
58  
59  
60



HIV and image & performance enhancing drug use.

8

## METHODS

**Recruitment.** In E&W, PWID have been recruited into a voluntary unlinked-anonymous monitoring survey since 1990, methodological details of which have been published previously.[26,27,37] Briefly, agencies providing services to PWID (e.g. NSPs and addiction treatment) at sentinel locations throughout E&W invite clients who have ever injected to participate. Sentinel sites are selected so as to reflect both the geographic distribution and range of services offered to PWID. Those who agree (overall refusal rate during 2010/11, 4.7%) provide a biological sample and self-complete a brief questionnaire focused on psychoactive drug use.[26,27,37] This study purposively recruited IPED injectors through 19 NSP. Participants were recruited either when attending a NSP site or through outreach provision, they provided an oral-fluid sample and self-completed a short, specially developed, questionnaire focused on IPED use (types of drug used and routes of administration), related behaviours (injecting practices and sexual behaviours) and health service use.

**Laboratory methods.** Oral-fluid specimens were collected using the OraSure™ device (OraSure Technologies Inc, Pennsylvania, USA). These were tested for anti-HIV using an in-house GACELISA with similar performance to GACELISA HIV 1+2 (Abbott Murex Diagnostics Ltd, Dartford, UK). Reactive specimens underwent further testing according to a proven algorithm that included a second ELISA and Western Blot (sensitivity and specificity approaches 100%[38]). Anti-HCV testing employed a previously validated commercial enzyme-immunoassay (Ortho HCV 3.0 SAve, Ortho Diagnostics) with 92% sensitivity and 99% specificity,[39] and for anti-HBc an in-house IgG class-specific antibody capture EIA procedure was used, estimated sensitivity 75% and specificity 99% (JV Parry & A Judd, personal communication). Oral-fluid sample quality was verified by testing each one for the presence of a pre-determined minimum quantity of total IgG (1mg/litre) employing an in-house ELISA method.

HIV and image & performance enhancing drug use.

9

1  
2  
3  
4  
5  
6 **Analyses.** Descriptive analyses were undertaken first, then bivariate associations  
7 ( $p < 0.05$ ) between outcomes variables (anti-HIV, anti-HBc and anti-HCV positivity,  
8 equipment sharing and condom use) and co-variables (age, drug use, sexual practice, and  
9 health services use; table 1) were examined using Fisher's exact (when expected cell  
10 frequencies  $< 5$ ) and Pearson's Chi-square tests. Where possible associations were found  
11 ( $p < 0.10$ ) these were further examined via logistic regression models using forward  
12 stepwise procedures to select variables, with selection based on the likelihood ratio test  
13 ( $p < 0.05$ ). All analyses were undertaken using SPSS 19.  
14  
15  
16  
17  
18  
19  
20  
21  
22  
23  
24  
25  
26  
27  
28  
29  
30  
31  
32  
33  
34  
35  
36  
37  
38  
39  
40  
41  
42  
43  
44  
45  
46  
47  
48  
49  
50  
51  
52  
53  
54  
55  
56  
57  
58  
59  
60

HIV and image & performance enhancing drug use.

10

## RESULTS

Between May 2010 and May 2011, 400 IPED injectors participated in this study; five (1.25%) women were excluded from the analyses (due to the small number). Of those reporting their age (88%, n=347), a quarter (27%) were aged <25 years (table 1).

Overall, 1.5% (95%CI 0.7%-3.3%; n=6) had anti-HIV, 8.8% (95%CI 6.4%-12%) had ever been infected with hepatitis B (26 anti-HBc positive, adjusted for test sensitivity of 0.75) and 5.5% (95%CI 3.7%-8.2%) exposed to hepatitis C (20 anti-HCV positive, adjusted for test sensitivity of 0.92).

**IPED Use.** During the preceding year, 86% reported injecting AS and over half also reported consuming these orally (57%); a third reported injecting growth hormone (32%), almost a quarter using oral anti-estrogens (23%), and a fifth (20%) taking ephedrine orally (table 1). Overall 65% (n=252) had taken an IPED orally during the preceding year, with 58 (23%) of these having taken two types orally, and 85 (34%)  $\geq 3$  types. Most had injected only one type of IPED during the preceding year; however, 87 (22%) had injected two types and 58 (15%)  $\geq 3$  types. Considering both injecting and oral use, 71 (18%) had taken two types of IPED and 133 (34%)  $\geq 3$  during the preceding year. Those who injected human growth hormone were more like to be older (aged >35 years) than those who had not (37% [47/128] vs. 22% [60/267],  $p < 0.001$ ); there were no other significant differences in the IPEDs used by age.

Most participants reported injecting themselves during the preceding year; 17% reported being injected by someone-else (table 1). The majority (88%) had injected intramuscularly during the preceding year, with 39% reporting subcutaneous injection (table 1). Overall, 8.9% (95%CI 6.4%-12%) reported having ever shared a needle/syringe or drugs vial (table 1); 27 (6.8%) had just shared a vial, six (1.5%) had just shared a needle/syringe and two (0.51%) had shared both.

HIV and image & performance enhancing drug use.

11

**Table 1: Characteristics of male injectors of image and performance drugs (IPED).**

| Characteristics                                                  |              | n       | IPED use, last year                                            | n             | Use of other illicit drugs | n                                            |                                                    |      |     |
|------------------------------------------------------------------|--------------|---------|----------------------------------------------------------------|---------------|----------------------------|----------------------------------------------|----------------------------------------------------|------|-----|
| Age, years                                                       | Under 25     | 27%     | 106                                                            | 0 to 4        | 36%                        | 141                                          | Ever injected illicit drug other than an IPED      | 4.8% | 19  |
|                                                                  | 25 to 34     | 34%     | 134                                                            | 5 or more     | 32%                        | 128                                          | Snorted cocaine, last year                         | 46%  | 181 |
|                                                                  | 35 and over  | 27%     | 107                                                            | Median (IQR)  | 4 (8)                      |                                              | Snorted, drunk or swallowed amphetamine, last year | 12%  | 47  |
|                                                                  | Median (IQR) | 28 (13) |                                                                | Not reported  | 32%                        | 126                                          | <b>Injecting practice</b>                          |      |     |
|                                                                  | Not reported | 12%     | 48                                                             | IPED injected |                            |                                              | Someone else                                       | 17%  | 68  |
| Had ever been in prison                                          | 16%          | 63      | Anabolic steroids                                              | 86%           | 340                        | Usually injected by, last year               | Myself                                             | 74%  | 294 |
| <b>Health service use</b>                                        |              |         | Growth hormone                                                 | 32%           | 128                        |                                              | Not reported                                       | 8.4% | 33  |
| Ever used a Needle and Syringe Programme                         | 75%          | 298     | Human chorionic gonadotropin (hCG)                             | 16%           | 62                         | Intramuscular injection, last year           |                                                    | 88%  | 346 |
| Seen a General Practitioner about their health, last year        | 45%          | 178     | Insulin                                                        | 5.6%          | 22                         | Subcutaneous injection, last year            |                                                    | 39%  | 154 |
| Sought advice at an Emergency / Minor injuries clinic, last year | 16%          | 64      | Melanotan I /II                                                | 8.6%          | 34                         | Ever shared needle, syringe or vial          |                                                    | 8.9% | 35  |
| Taken / used prescribed medication, last year                    | 28%          | 111     | Others (incl. EPO, IGF-1 and Nubain)                           | 5.1%          | 20                         | <b>Sexual Behaviour, last year</b>           |                                                    |      |     |
| Sought advice from a sexual health / STI clinic, last year       | 17%          | 68      | IPED taken orally                                              |               |                            | Number of sexual partners                    | One                                                | 38%  | 152 |
| Taken up offer of the vaccine against hepatitis B                | 23%          | 90      | Anabolic steroids                                              | 57%           | 226                        |                                              | Two or more                                        | 47%  | 187 |
| Ever had a blood test for hepatitis C                            | 22%          | 85      | Anti-oestrogens                                                | 23%           | 92                         |                                              | No sex / Not reported                              | 14%  | 56  |
| Ever had a blood test for HIV                                    | 31%          | 122     | Clenbuterol                                                    | 15%           | 60                         | Gender of sexual partners                    | Male partner(s)                                    | 3.3% | 13  |
| <b>Symptom of injury or infection at injection site</b>          |              |         | Ephedrine                                                      | 20%           | 78                         |                                              | No male partners                                   | 82%  | 323 |
| Ever had redness at an injection site                            | 43%          | 168     | Thyroid hormones                                               | 9%            | 37                         |                                              | No sex / Not reported                              | 15%  | 59  |
| Ever had an injection site abscess/sore/open wound               | 6.8%         | 27      | Phosphodiesterase type 5 inhibitors ("Viagra /Cialis")         | 6.6%          | 26                         | Always condom (anal / vaginal sex) or no sex |                                                    | 20%  | 78  |
|                                                                  |              |         | Other (incl. diuretics, DNP, prohormones/designer supplements) | 12%           | 46                         |                                              |                                                    |      |     |

Key. STI: sexually transmitted infection; EPO: ethryopoetin; IGF-1: insulin-like growth factor 1; Nubain: nalbuphine hydrochloride; DNP: 2,4-dinitrophenol.

HIV and image & performance enhancing drug use.

12

1  
2  
3  
4  
5  
6  
7  
8  
9  
10  
11  
12  
13  
14  
15  
16  
17  
18  
19  
20  
21  
22  
23  
24  
25  
26  
27  
28  
29  
30  
31  
32  
33  
34  
35  
36  
37  
38  
39  
40  
41  
42  
43  
44  
45  
46  
47  
48  
49  
50  
51  
52  
53  
54  
55  
56  
57  
58  
59  
60

**Psychoactive drug use.** During the preceding year, 46% reported snorting cocaine and 12% reported snorting, drinking or swallowing amphetamine. Ever having injected a psychoactive drug (including heroin and cocaine) was reported by 4.8% (table 1). Those who had injected a psychoactive drug were more likely to report injecting insulin as an IPED than those who had not (21% [4/19] vs. 4.8% [18/376],  $p=0.016$ ); there were no other significant differences in the IPEDs used between those who injected psychoactive drugs and those who had not. Those who had injected psychoactive drugs were more likely to report having ever shared a needle/syringe or vial than those who had not (37% [7/19] vs. 7.4% [28/376],  $p=0.001$ ).

**Sexual behaviour.** Nine-tenths (89%, 350/395) reported having anal or vaginal sex in the preceding year, with 47% of these reporting  $\geq 2$  sexual partners and 9.1% (36/395)  $\geq 10$  partners (table 1). Considering just female partners, 20% (80/395) of respondents had  $\geq 5$ . Thirteen (3.3%) reported  $\geq 1$  male sexual partners during the preceding year (table 1). Overall, 20% (95%CI 16%-24%) had either always used condoms or not had sex during the preceding year (table 1); among those who reported sex during the preceding year 14% (95%CI 11%-18%, 48/350) had always used condoms.

Those reporting male sexual partners were older than those who did not (median age 38 years, IQR 12; and 28 years, IQR 11, respectively). Those reporting male sexual partners were also more likely to have ever injected a psychoactive drug (23% [3/13] vs. 4.2% [16/382],  $p=0.020$ ), more likely to report snorting, drinking, or swallowing amphetamine during the last year (46% [6/13] vs. 11% [41/382],  $p=0.002$ ), and a higher proportion reported snorting cocaine, but this difference was not significant (62% [8/13] vs. 45% [173/382],  $p=0.248$ ). Those reporting male sexual partners were also more likely to report having ever shared a needle/syringe or vial (25% [4/13] vs. 8.1% [31/382],  $p=0.021$ ). A higher proportion of those reporting male sexual partners reported always

HIV and image & performance enhancing drug use.

13

1  
2  
3  
4 using condoms during the last year, but this difference was not significant (38% [5/13] vs.  
5  
6 19% [73/382],  $p=0.146$ ). There were no differences in the types of IPED used, nor in  
7  
8 their routes of administration, between those reporting male partners and those not.  
9

10  
11 **Health service use.** The participants had used a range of health services (table 1), with  
12  
13 75% having used an NSP (though participants were recruited via NSP, some were  
14  
15 recruited during targeted outreach and so may not have seen this as NSP use). During  
16  
17 the preceding year, 45% had seen a General Practitioner, 17% sought advice from a  
18  
19 Sexual Health (SH)/Sexually Transmitted Infection (STI) clinic, 16% used an  
20  
21 Emergency/Minor injuries clinic, and 28% had taken prescribed medication. Overall, 23%  
22  
23 reported HBV vaccine uptake, 31% ever having a diagnostic HIV test and 22% a HCV  
24  
25 test (table 1).  
26  
27

28  
29  
30 **Factors associated with infection.** Covariates associated with anti-HIV, anti-HBc or  
31  
32 anti-HCV positivity in bivariate and multivariate analyses are summarised in table 2. In  
33  
34 the multivariable analysis, anti-HIV positivity was associated with having male sexual  
35  
36 partners in preceding year, ever having an abscess/sore/open wound at injection site,  
37  
38 and having sought advice from a SH/STI clinic in the preceding year (table 2). Having  
39  
40 anti-HBc was associated in the multivariable analysis with having obtained advice from  
41  
42 SH/STI clinic and having not injected subcutaneously in the preceding year (table 2).  
43  
44 Anti-HCV positivity was associated with having ever injected a psychoactive drug and  
45  
46 having taken a phosphodiesterase type 5 inhibitor (PDE5i) in the preceding year in the  
47  
48 multivariable analysis (table 2).  
49  
50  
51  
52  
53  
54  
55  
56  
57  
58  
59  
60

HIV and image & performance enhancing drug use.

14

**Table 2: Factors associated with HIV, hepatitis B and C infection among male injectors of image and performance drugs (IPED).**

|                                                            |                                               | Total                      | Positive |            | Unadjusted odds Ratio with 95% CI |      |       | Adjusted odds Ratio with 95% CI |  |  |
|------------------------------------------------------------|-----------------------------------------------|----------------------------|----------|------------|-----------------------------------|------|-------|---------------------------------|--|--|
| <b>HIV</b>                                                 |                                               | 395                        | 6        | 1.5%       |                                   |      |       |                                 |  |  |
| Age, years*                                                | Aged<35 or age unknown                        | 287                        | 1        | 0.3%       | 1.0                               |      |       | *                               |  |  |
|                                                            | Aged 35 or over                               | 102                        | 5        | 4.9%       | 14                                | 1.62 | - 122 |                                 |  |  |
|                                                            |                                               | <i>Fisher's Exact Test</i> |          | <i>p</i> = | 0.006                             |      |       |                                 |  |  |
| Gender of sexual partners last year*                       | Male sexual partner                           | 13                         | 3        | 23%        | 38 6.79 - 211                     |      |       |                                 |  |  |
|                                                            | No male partner reported/No sex               | 382                        | 3        | 0.8%       | 1.0                               |      |       |                                 |  |  |
|                                                            |                                               | <i>Fisher's Exact Test</i> |          | <i>p</i> = | 0.001                             |      |       |                                 |  |  |
| Gender of sexual partners last year and Age (in years)     | Male sexual partner                           | 13                         | 3        | 23%        | 85 8.13 - 893                     |      |       | 79 4.29 - 1,450                 |  |  |
|                                                            | No male partners, aged<35 or age not reported | 285                        | 1        | 0.4%       | 1.0                               |      |       | 1.0                             |  |  |
|                                                            | No male partners, aged 35 or over             | 97                         | 2        | 2.1%       | 6 0.54 - 67                       |      |       | 9 0.59 - 135                    |  |  |
|                                                            |                                               | <i>Pearson Chi-Square</i>  |          | <i>p</i> < | 0.001                             |      |       |                                 |  |  |
| Injected illicit other than PIED                           | Yes                                           | 19                         | 2        | 11%        | 11 1.87 - 64                      |      |       | †                               |  |  |
|                                                            | No / Not reported                             | 376                        | 4        | 1.1%       | 1.0                               |      |       |                                 |  |  |
|                                                            |                                               | <i>Fisher's Exact Test</i> |          | <i>p</i> = | 0.029                             |      |       |                                 |  |  |
| Ever had an abscess/sore/open wound at injection site      | Yes                                           | 27                         | 2        | 7.4%       | 7.3 1.27 - 42                     |      |       | 77 3.27 - 1,795                 |  |  |
|                                                            | No / Not sure                                 | 368                        | 4        | 1.1%       | 1.0                               |      |       | 1.0                             |  |  |
|                                                            |                                               | <i>Fisher's Exact Test</i> |          | <i>p</i> = | 0.057                             |      |       |                                 |  |  |
| Taken or used any prescribed medication in last year       | Yes                                           | 111                        | 5        | 4.5%       | 13 1.54 - 116                     |      |       | †                               |  |  |
|                                                            | No / Not sure                                 | 284                        | 1        | 0.4%       | 1.0                               |      |       |                                 |  |  |
|                                                            |                                               | <i>Fisher's Exact Test</i> |          | <i>p</i> = | 0.008                             |      |       |                                 |  |  |
| Sought advice from a sexual health /STI clinic, last year? | Yes                                           | 68                         | 4        | 5.9%       | 10 1.82 - 57                      |      |       | 24 1.03 - 542                   |  |  |
|                                                            | No / Not sure                                 | 327                        | 2        | 0.6%       | 1.0                               |      |       | 1.0                             |  |  |
|                                                            |                                               | <i>Fisher's Exact Test</i> |          | <i>p</i> = | 0.009                             |      |       |                                 |  |  |
| Have you ever been vaccinated against hepatitis B          | Yes                                           | 90                         | 4        | 4.4%       | 7.0 1.27 - 39                     |      |       | †                               |  |  |
|                                                            | No / Not sure                                 | 305                        | 2        | 0.7%       | 1.0                               |      |       |                                 |  |  |
|                                                            |                                               | <i>Fisher's Exact Test</i> |          | <i>p</i> = | 0.026                             |      |       |                                 |  |  |
| Have you ever had a blood test for hepatitis C             | Yes                                           | 81                         | 4        | 4.7%       | 7.6 1.37 - 42                     |      |       | †                               |  |  |
|                                                            | No / Not sure                                 | 308                        | 2        | 0.9%       | 1.0                               |      |       |                                 |  |  |
|                                                            |                                               | <i>Fisher's Exact Test</i> |          | <i>p</i> = | 0.021                             |      |       |                                 |  |  |
| Have you ever had a blood test for HIV?                    | Yes                                           | 122                        | 4        | 3.3%       | 4.6 0.83 - 25                     |      |       | †                               |  |  |
|                                                            | No / Not sure                                 | 273                        | 2        | 0.7%       | 1.0                               |      |       |                                 |  |  |
|                                                            |                                               | <i>Fisher's Exact Test</i> |          | <i>p</i> = | 0.076                             |      |       |                                 |  |  |
| Ever shared needle, syringe or vial                        | Yes                                           | 35                         | 2        | 5.7%       | 5.4 0.95 - 31                     |      |       | †                               |  |  |
|                                                            | No / Not sure                                 | 360                        | 4        | 1.1%       | 1.0                               |      |       |                                 |  |  |
|                                                            |                                               | <i>Fisher's Exact Test</i> |          | <i>p</i> = | 0.091                             |      |       |                                 |  |  |

\* Combined variable was entered into the final multivariate model due to an interaction between age and reporting male sexual partners: with 77% of those with male sexual partners aged over 35 years compared with 25% of those not reporting male sexual partners.

**Table 2 cont: Factors associated with HIV, hepatitis B and C infection among male injectors of image and performance drugs (IPED).**

|                                                               |                   | Total | Positive               | Unadjusted odds ratio with 95% CI |            | Adjusted odds ratio with 95% CI |            |
|---------------------------------------------------------------|-------------------|-------|------------------------|-----------------------------------|------------|---------------------------------|------------|
| <b>Anti-HBc</b>                                               |                   | 395   | 26 6.6%                |                                   |            |                                 |            |
| Sought advice from a sexual health /STI clinic, last year?    | Yes               | 68    | 10 14.7%               | 3.4                               | 1.4 – 7.7  | 3.8                             | 1.6 – 8.9  |
|                                                               | No / Not sure     | 327   | 16 4.9%                | 1.0                               |            | 1.0                             |            |
|                                                               |                   |       | Fisher's Exact Test p= | 0.006                             |            |                                 |            |
| Subcutaneous injection, last year                             | Yes               | 154   | 6 3.9%                 | 1.0                               |            | 1.0                             |            |
|                                                               | No / Not sure     | 241   | 20 8.3%                | 2.2                               | 0.88 – 5.7 | 2.6                             | 0.99 – 6.7 |
|                                                               |                   |       | Pearson Chi-Square p=  | 0.085                             |            |                                 |            |
| <b>Anti-HCV</b>                                               |                   | 395   | 20 5.1%                |                                   |            |                                 |            |
| Age, years                                                    | Under25           | 106   | 4 3.8%                 | 1.0                               |            |                                 |            |
|                                                               | 25–34             | 134   | 3 2.2%                 | 0.58                              | 0.13 – 2.7 |                                 |            |
|                                                               | 35 and over       | 107   | 10 9.3%                | 2.6                               | 0.80 – 8.7 |                                 | †          |
|                                                               | Not reported      | 48    | 3 6.3%                 | 1.7                               | 0.37 – 7.9 |                                 |            |
|                                                               |                   |       | Pearson Chi-Square p=  | 0.078                             |            |                                 |            |
| Injected illicit other than IPED                              | Yes               | 19    | 3 15.8%                | 4.0                               | 1.1 – 15   | 4.4                             | 1.1 – 17.2 |
|                                                               | No / Not reported | 376   | 17 4.5%                | 1.0                               |            | 1.0                             |            |
|                                                               |                   |       | Fisher's Exact Test p= | 0.064                             |            |                                 |            |
| Taken or used any prescribed medication, last year            | Yes               | 111   | 10 9.0%                | 2.7                               | 1.1 – 7    |                                 |            |
|                                                               | No / Not sure     | 284   | 10 3.5%                | 1.0                               |            |                                 | †          |
|                                                               |                   |       | Pearson Chi-Square p=  | 0.025                             |            |                                 |            |
| Ever had a blood test for hepatitis C                         | Yes               | 85    | 8 9.4%                 | 1.7                               | 0.55 – 5.6 |                                 |            |
|                                                               | No                | 221   | 7 3.2%                 | 0.5                               | 0.17 – 1.8 |                                 | †          |
|                                                               | Not sure          | 89    | 5 5.6%                 | 1.0                               |            |                                 |            |
|                                                               |                   |       | Pearson Chi-Square p=  | 0.080                             |            |                                 |            |
| Taken Phosphodiesterase type 5 inhibitors ("Viagra / Cialis") | Yes               | 26    | 5 19%                  | 5.6                               | 1.9 – 17   | 6.0                             | 1.9 – 18   |
|                                                               | No                | 369   | 15 4.1%                | 1.0                               |            | 1.0                             |            |
|                                                               |                   |       | Fisher's Exact Test p= | 0.007                             |            |                                 |            |
| Injected insulin (as IPED)                                    | Yes               | 22    | 4 18%                  | 5.0                               | 1.5 – 16   |                                 |            |
|                                                               | No                | 373   | 16 4.3%                | 1.0                               |            |                                 | †          |
|                                                               |                   |       | Fisher's Exact Test p= | 0.019                             |            |                                 |            |
| Other injected IPED (incl. EPO, IGF-1 and Nubain)             | Yes               | 20    | 3 15%                  | 3.7                               | 0.99 – 14  |                                 |            |
|                                                               | No                | 375   | 17 4.5%                | 1.0                               |            |                                 | †          |
|                                                               |                   |       | Fisher's Exact Test p= | 0.073                             |            |                                 |            |
| Ever shared needle, syringe or drug vial                      | Yes               | 35    | 4 11%                  | 2.8                               | 0.87 – 8.8 |                                 |            |
|                                                               | No / Not sure     | 360   | 16 4%                  | 1.0                               |            |                                 | †          |
|                                                               |                   |       | Fisher's Exact Test p= | 0.090                             |            |                                 |            |

† Not in final model.

Key. STI: sexually transmitted infection; EPO: erythropoetin; IGF-1: insulin-like growth factor 1; Nubain: nalbuphine hydrochloride.

After excluding those who reported *either* sex with men *or* ever injected a psychoactive drug, 0.8% had anti-HIV (95%CI 0.28%-2.4%, 3/366), 8.0% anti-HBc (95%CI 5.6%-11%, adjusted for test sensitivity, 22/366), and 4.7% anti-HCV (95%CI 2.9%-7.3%, adjusted for test sensitivity, 16/366); with 10% (95%CI 7.7%-14%, 38/366) having one or more of these three markers. In this group, having anti-HIV was found to be associated only with ever having had an abscess/wound at an injection site (8% [2/25] vs. 0.29% [1/341] for



HIV and image & performance enhancing drug use.

16

1  
2  
3 those who had not,  $p=0.013$ ), and having anti-HBc was only associated with having  
4 sought advice from a SH/STI clinic in the preceding year (16% [9/56] vs. 4.2% [13/310]  
5 for those who had not,  $p=0.002$ ). The use of three types IPEDs was associated with  
6 having anti-HCV: having taken a PDE5i (21% [5/24] vs. 3.2% [11/342] for those who had  
7 not,  $p=0.002$ ); having injected insulin as IPED (18% [3/17] vs. 3.7% [13/349] for those  
8 who had not,  $p=0.032$ ); and having injected a less commonly used IPED (17% [3/18] vs.  
9 3.7% [13/348] for those who had not,  $p=0.037$ ).  
10  
11  
12  
13  
14  
15  
16  
17  
18  
19

20 **Co-infection.** In total, 47 (12%, 95%CI 9.1%-15%;) were positive for one or more of anti-  
21 HIV, anti-HBc and anti-HCV, with 43 having just one of these markers and four having  
22 two or more of these markers. Two had both anti-HBc and anti-HCV, one of these  
23 reported injected psychoactive drugs, neither reported having had sex with men. One,  
24 who reported both sex with men and injecting psychoactive drugs, had both anti-HIV and  
25 anti-HBc; the remaining participant had all three markers and did not report with either  
26 sex with men or injecting psychoactive drugs.  
27  
28  
29  
30  
31  
32  
33  
34  
35

36 **Factors associated with risk behaviours.** Factors associated with sharing of injecting  
37 equipment and condom use in the bivariate and multivariate analyses are summarised in  
38 table 2. In the multivariable analysis ever having shared a needle/syringe or drug vial was  
39 associated with having ever injected a psychoactive drug, having sought advice from a  
40 SH/STI clinic, subcutaneous injection, and having snorted, drunk or swallowed  
41 amphetamine (table 3). Always using condom among those who had had anal/vaginal  
42 sex during the preceding year was associated in the multivariable analysis with having  
43 had a male sexual partner and having not snorted cocaine (table 3).  
44  
45  
46  
47  
48  
49  
50  
51  
52  
53  
54  
55  
56  
57  
58  
59  
60

**Table 3: Factors associated with risk behaviours among male injectors of image and performance drugs (IPED).**

|                                                           | Total | Yes       | Unadjusted odds ratio with 95% CI | Adjusted odds ratio with 95% CI |
|-----------------------------------------------------------|-------|-----------|-----------------------------------|---------------------------------|
| Ever shared needle, syringe or vial                       | 395   | 35 8.9%   |                                   |                                 |
| Number of sexual partners, last year                      |       |           |                                   | †                               |
| One                                                       | 152   | 8 5.3%    | 0.3 0.12 - 0.94                   |                                 |
| Two or more                                               | 187   | 19 10%    | 0.7 0.28 - 1.6                    |                                 |
| Not reported / No sex                                     | 56    | 8 14%     | 1.0                               |                                 |
| Pearson Chi-Square                                        |       | p= 0.088  |                                   |                                 |
| Gender of sexual partners, last year                      |       |           |                                   | †                               |
| Male partner(s)                                           | 13    | 4 31%     | 5.5 1.6 - 19                      |                                 |
| No male partners                                          | 323   | 24 7.4%   | 1.0                               |                                 |
| Not reported / No sex                                     | 59    | 7 12%     | 1.7 0.69 - 4.1                    |                                 |
| Pearson Chi-Square                                        |       | p= 0.010  |                                   |                                 |
| Injected illicit other than IPED                          |       |           |                                   |                                 |
| Yes                                                       | 19    | 7 37%     | 7.2 2.6 - 20                      | 6.3 2.1 - 19                    |
| No / Not reported                                         | 376   | 28 7.4%   | 1.0                               | 1.0                             |
| Fisher's Exact Test                                       |       | p= 0.001  |                                   |                                 |
| Sought advice from a sexual health /STI clinic, last year |       |           |                                   |                                 |
| Yes                                                       | 68    | 11 16%    | 2.4 1.1 - 5.2                     | 2.2 1.0 - 5.1                   |
| No / Not sure                                             | 327   | 24 7.3%   | 1.0                               | 1.0                             |
| Pearson Chi-Square                                        |       | p= 0.020  |                                   |                                 |
| Injected growth hormone (as IPED)                         |       |           |                                   | †                               |
| Yes                                                       | 128   | 18 14%    | 2.4 1.2 - 4.8                     |                                 |
| No                                                        | 267   | 17 6.4%   | 1.0                               |                                 |
| Pearson Chi-Square                                        |       | p= 0.012  |                                   |                                 |
| Injected insulin (as IPED)                                |       |           |                                   | †                               |
| Yes                                                       | 22    | 5 23%     | 3.4 1.2 - 9.8                     |                                 |
| No                                                        | 373   | 30 8.0%   | 1.0                               |                                 |
| Fisher's Exact Test                                       |       | p= 0.035  |                                   |                                 |
| Subcutaneous injection, last year                         |       |           |                                   |                                 |
| Yes                                                       | 154   | 21 14%    | 2.6 1.3 - 5.2                     | 3.0 1.4 - 6.5                   |
| No / Not sure                                             | 241   | 14 6%     | 1.0                               | 1.0                             |
| Pearson Chi-Square                                        |       | p= 0.008  |                                   |                                 |
| Snorted cocaine, last year                                |       |           |                                   | †                               |
| Yes                                                       | 181   | 22 12%    | 2.1 1.0 - 4.4                     |                                 |
| No                                                        | 214   | 13 6.1%   | 1.0                               |                                 |
| Pearson Chi-Square                                        |       | p= 0.034  |                                   |                                 |
| Snorted, drunk or swallowed amphetamine, last year        |       |           |                                   |                                 |
| Yes                                                       | 47    | 11 23%    | 4.1 1.9 - 9.1                     | 4.1 1.7 - 9.8                   |
| No                                                        | 348   | 24 6.9%   | 1.0                               | 1.0                             |
| Pearson Chi-Square                                        |       | p= 0.0002 |                                   |                                 |
| Always used condom for anal / vaginal sex                 | 350   | 48 14%    |                                   |                                 |
| Gender of sexual partners, last year                      |       |           |                                   |                                 |
| Male partner(s)                                           | 13    | 5 38%     | 8.1 0.8 - 83                      | 14 1.3 - 155                    |
| No male partners                                          | 323   | 42 13%    | 1.9 0.25 - 15                     | 2.8 0.35 - 22                   |
| Not reported                                              | 14    | 1 7.1%    | 1.0                               | 1.0                             |
| Pearson Chi-Square                                        |       | p= 0.025  |                                   |                                 |
| Ever had a blood test for hepatitis C                     |       |           |                                   | †                               |
| Yes                                                       | 82    | 17 21%    | 3.2 1.1 - 9                       |                                 |
| No                                                        | 201   | 26 13%    | 1.8 0.68 - 5.0                    |                                 |
| Not sure                                                  | 67    | 5 7.5%    | 1.0                               |                                 |
| Pearson Chi-Square                                        |       | p= 0.057  |                                   |                                 |
| Injected anabolic steroids                                |       |           |                                   |                                 |
| Yes                                                       | 304   | 46 15%    | 3.9 0.92 - 17                     | 4.2 0.96 - 18                   |
| No                                                        | 46    | 2 4.3%    | 1.0                               | 1.0                             |
| Pearson Chi-Square                                        |       | p= 0.048  |                                   |                                 |
| Intramuscular injection, last year                        |       |           |                                   | †                               |
| Yes                                                       | 310   | 46 15%    | 3.3 0.77 - 14                     |                                 |
| No / No sure                                              | 40    | 2 5.0%    | 1.0                               |                                 |
| Pearson Chi-Square                                        |       | p= 0.089  |                                   |                                 |
| Snorted cocaine, last year                                |       |           |                                   |                                 |
| Yes                                                       | 162   | 11 7%     | 0.3 0.1 - 0.6                     | 0.2 0.12- 0.52                  |
| No                                                        | 188   | 37 20%    | 1.0                               | 1.0                             |
| Pearson Chi-Square                                        |       | p= 0.0005 |                                   |                                 |

† Not in final model.

Key. STI: sexually transmitted infection.

HIV and image & performance enhancing drug use.

18

## DISCUSSION

IPED injectors are at risk of infection with HIV as well as other BBVs. This is the first prevalence study to have found HIV among IPED injectors, with the prevalence at 1.5%, similar to that found among injectors of psychoactive drugs in England and Wales (1.2%, 2011[40]). However, anti-HBc and anti-HCV – at 8.8% and 5.5% respectively – are lower than among psychoactive drug injectors (16% and 43% respectively, 2011 [40]). The prevalence of all three BBVs in this sample would appear to be higher than that found in the general UK population.[41,42] Once those who reported either sex with men or injecting psychoactive drugs were excluded, 10% had been infected with one or more of HIV, hepatitis B and hepatitis C.

It is important to consider the limitations of this study. The comparative rarity, marginalisation and illicit nature of injecting drug use impede the construction of a sampling frame, making the representativeness of our sample impossible to measure. This study used an established methodology for recruiting PWID through specialist services;[26,27] however, the robustness of this approach for IPED injectors is unknown and cannot currently be assessed due to the very limited knowledge on the size and nature of this group.[3,5] The use of NSP to access this group was a pragmatic approach; community based recruitment approaches, such as Respondent Driven Sampling and Time-Location Sampling, that are often advocated for hard to reach populations[43] are possible alternatives. However, these are likely to be difficult to implement with this group due to the diversity of the drugs used, the clandestine and close-knit nature of this group and because use usually takes place in private settings (such as homes or gyms).[3,5] The findings here also rely on self-reported behaviours – though their reliability has not been assessed among IPED users, these have been found to be reliable for psychoactive drug injectors[44,45] - and infection with BBVs has been determined by laboratory-based biological data from the testing of oral-fluid samples.

HIV and image & performance enhancing drug use.

19

1  
2  
3  
4  
5  
6  
7  
8  
9  
10  
11  
12  
13  
14  
15  
16  
17  
18  
19  
20  
21  
22  
23  
24  
25  
26  
27  
28  
29  
30  
31  
32  
33  
34  
35  
36  
37  
38  
39  
40  
41  
42  
43  
44  
45  
46  
47  
48  
49  
50  
51  
52  
53  
54  
55  
56  
57  
58  
59  
60

Whilst oral-fluid testing is highly sensitive for anti-HIV, the sensitivity is reduced for anti-HCV and anti-HBc.[39] Whilst this study is the largest of BBVs in this population, the sample size still restricts its power, and consequently caution is needed when attempting to generalise these findings to the wider population of IPED injectors.

The levels of HIV and anti-HBc are both higher than in the only previous UK study to measure these in IPED injectors. Undertaken >10 years ago using a similar methodology, this found no HIV and an anti-HBc prevalence of 2%;[20] suggesting that the prevalence of these infections among IPED injectors *might* have increased over time. Exposure to BBVs among IPED injectors appears to be associated with sexual risks and the injection of psychoactive drugs; although *injecting* psychoactive drugs is rare among IPED injectors, unprotected sex with multiple partners is common. The sharing of injecting equipment or drug vials among IPED injectors at 8.9% is much less common than among injectors of psychoactive drugs (in 2011, 37% of psychoactive drug injectors reported recently sharing injecting equipment[40]). Though exposure was not associated with sharing in the multivariate analyses in this study, BBV transmission through IPED injection cannot be excluded as this study may have lacked sufficient power to detect this.

The association between having HIV and the use of SH/STI clinics, and the association with having male sexual partners, suggest that HIV transmission among IPED injectors might be related to sexual activity. This association may reflect AS use by some HIV positive gay and bisexual men to mask the longer-term effects of HIV infection.[35] The association with having an abscess/wound at the injection site probably reflects the greater vulnerability of PWID with HIV to injection related bacterial infections.[46,47] The association between exposure to HBV and having obtained advice from a SH/STI clinic is again suggestive of a role for sexual risk in infection, particularly as sexual transmission is

HIV and image & performance enhancing drug use.

20

1  
2  
3  
4  
5  
6  
7  
8  
9  
10  
11  
12  
13  
14  
15  
16  
17  
18  
19  
20  
21  
22  
23  
24  
25  
26  
27  
28  
29  
30  
31  
32  
33  
34  
35  
36  
37  
38  
39  
40  
41  
42  
43  
44  
45  
46  
47  
48  
49  
50  
51  
52  
53  
54  
55  
56  
57  
58  
59  
60

the main route by which the HBV is now acquired within the UK.[48] The association between having anti-HBc and not injecting subcutaneously suggests that certain patterns of IPED use might be related to increased risk; as some IPED are only injected subcutaneously and others only intramuscularly, and many users take several types.[3,8,12,13,14] Exposure to HCV, however, would appear to be associated with the injection of psychoactive drugs – an association that has been previously noted[6] - this finding might reflect more frequent injecting in this sub-group. Sexual activity may also play a role, assuming that the use of PDE5i is related to improving or maintaining sexual performance. These associations all require further investigation.

The level sharing found here was in-line with previous studies of injecting risk among IPED users.[20,28,29,30,32,33,35] The association between sharing and subcutaneous injection, suggests that sharing – like HBV exposure – may be associated with certain patterns of IPED use. As in previous studies of IPED injectors, sexual activity was common, and condom use was poor.[20,28,34] Condom use was higher among those with male sexual partners, and lower among those who reported snorting cocaine. The more frequent use of condoms by gay and bisexual men probably reflects awareness of their increased HIV risk.[42] The association with cocaine use might possibly be related to its use as a sexual stimulant, with this possibly related to attempts to counteract the reduced libido experienced on discontinuation of AS use or in the periods between courses of AS use ('off-cycles').[14] In part, this effect may be as a result of the decrease in endogenous testosterone production,[49] and is why IPEDs users self-treat with human chorionic gonadotrophin in an attempt to stimulate endogenous production, with PDE5i used to symptomatically treat erectile dysfunction.[5,14,50] Increased libido following AS administration is also reported by users[14,33,34,51] with similar effects being reported following the use of drugs such as melanotan-II.[12]

HIV and image & performance enhancing drug use.

21

1  
2  
3  
4 Associations were found between psychoactive drug use and both sharing and poor  
5 condom use. IPED users who also use psychoactive drugs may be a higher risk – or  
6 perhaps less risk averse - sub-group. Whilst this needs further investigation, it suggests  
7 – considering the substantial levels of psychoactive drug use found here and in previous  
8 studies[6,8,28,35,36] – that those using both IPED and psychoactive drugs should be an  
9 important target group for harm reduction interventions.  
10  
11  
12  
13  
14

15  
16  
17  
18 Our findings suggest that sexual risk and the use, and particularly the injection, of  
19 psychoactive drugs are possibly the most important factors associated with BBV  
20 transmission among IPED injectors. The transmission of HIV and other BBV through the  
21 injecting of IPED cannot be excluded, and this is certainly possible as equipment sharing  
22 does occur. However, this study largely recruited through NSP providing injecting  
23 equipment and advice. IPED injectors not in contact with NSP may have a different risk  
24 profile and so infection risk. Even so, our findings suggest the need for targeted  
25 interventions to address sexual health needs, psychoactive drug use, and the injection  
26 practices among IPED injectors. Considering the limitations of this study, a larger study  
27 recruiting from a wider range of settings and collecting dried-blood samples is needed to  
28 more fully examine prevalence and, in particular, the associated risk factors, and so the  
29 role of IPED injection in transmission of HIV and other BBVs.  
30  
31  
32  
33  
34  
35  
36  
37  
38  
39  
40  
41  
42  
43  
44  
45  
46  
47  
48  
49  
50  
51  
52  
53  
54  
55  
56  
57  
58  
59  
60

HIV and image & performance enhancing drug use.

22

**Acknowledgements:** We are grateful to all of the people who inject image and performance enhancing drugs who have taken part in the survey and to the various services across the England and Wales who assisted with their recruitment. We would like to thank the support staff who worked on the survey and those who undertook the laboratory work. The survey is undertaken by the Health Protection Agency which is funded through the Department of Health.

*Contributions:* All authors contributed to the writing of the paper, with writing and analyses led by VH. MEB, AK, JM, AM and VH developed the modified questionnaire used with IPED injectors. AM undertook the day-to-day co-ordination the survey of IPED injectors, with support from MEB and VH. The on-going monitoring survey is managed by VH and FN. Development of the laboratory tests and processes employed was led by JP, who managed their application to this study.

*Funding.* This research received no specific grant from any funding agency in the public, commercial or not-for-profit sectors.

*Competing interests.* None.

## References

- 1 Aceijas C, Stimson GV, Hickman M, *et al*. Global overview of injecting drug use and HIV infection among injecting drug users. *AIDS*. 2004;**18**(17):2295–303.
- 2 Nelson PK, Mathers BM, Cowie B, *et al*. Global epidemiology of hepatitis B and hepatitis C in people who inject drugs: results of systematic reviews. *The Lancet*. 2011;**378**(9791):571–83.
- 3 Evans-Brown M, McVeigh J, Perkins C, Bellis MA. Human Enhancement Drugs: The Emerging Challenges to Public Health. Liverpool, North West Public Health Observatory, April 2012. ISBN: 978-1-908929-01-3
- 4 McVeigh J, Evans-Brown M, Bellis MA. Human enhancement drugs and the pursuit of perfection. *Adicciones*. 2012;**24**(3):185–90.
- 5 Advisory Council on the Misuse of Drugs. Consideration of the anabolic steroids. Home Office; 2010 September.
- 6 Iversen J, Topp L, Wand H, Maher L. Are people who inject performance and image-enhancing drugs an increasing population of Needle and Syringe Program attendees? *Drug Alcohol Rev*. 2012 Aug 29. doi: 10.1111/j.1465-3362.2012.00499.x.
- 7 Aitken C, Cheryl D, Kay S. Pumping iron, risking infection? Exposure to hepatitis C, hepatitis B and HIV among anabolic-androgenic steroid injectors in Victoria, Australia. *Drug Alcohol Depend*. 2002;**65**(3):303–8.
- 8 Larance B, Degenhardt L, Copeland J, Dillon P. Injecting risk behaviour and related harm among men who use performance- and image-enhancing drugs. *Drug Alcohol Rev*. 2008;**27**(6):679–86.
- 9 Christiansen AV. Testing citizens training recreationally in gyms. In: McNamee M, Møller V, editors. Doping and anti-doping policy in sport. Abingdon: Routledge; 2011. p. 126–41.
- 10 Mulcahey MK, Schiller JR, Hulstyn MJ. Anabolic steroid use in adolescents: identification of those at risk and strategies for prevention. *Phys Sportsmed*. 2010;**38**(3):105–13..
- 11 Castillo Castillo EM, Comstock RD. Prevalence of use of performance-enhancing substances among United States adolescents. *Pediatr Clin North Am*. 2007;**54**(4):663–75
- 12 Evans Evans-Brown M, Dawson RT, Chandler M, McVeigh J. Use of melanotan I and II in the general population. *BMJ*. 2009;**338**:b566.
- 13 Evans-Brown M, McVeigh J. Injecting human growth hormone as a performance-enhancing drug—perspectives from the United Kingdom. *J Subst Use*. 2009;**14**(5):267–88.
- 14 Llewellyn W. William Llewellyn's anabolics. 10 ed. Jupiter (FL): Molecular Nutrition; 2010.
- 15 Marquis CP, Maffulli N. Anabolic steroid related abscess—a risk worth taking? *Inj Extra*. 2006;**37**(12):451–4.
- 16 Gautschi OP, Zellweger R. Images in clinical medicine. Methicillin-resistant *Staphylococcus aureus* abscess after intramuscular steroid injection. *N Engl J Med*. 2006;**355**(7):713.
- 17 Dunn F. Two cases of biceps injury in bodybuilders with initially misleading presentation. *Emerg Med J*. 2002 Sep 1;**19**(5):461–2.
- 18 Al Al-Ismail K, Torreggiani WC, Munk PL, Nicolaou S. Gluteal mass in a bodybuilder: radiological depiction of a complication of anabolic steroid use. *Eur Radiol*. 2002 Jun 1;**12**(6):1366–9.
- 19 Evans NA. Local complications of self administered anabolic steroid injections. *Br J Sports Med*. 1997;**31**(4):349–50.
- 20 Crampin AC, Lamagni TL, Hope VD, *et al*. The risk of infection with HIV and hepatitis B in individuals who inject steroids in England and Wales. *Epidemiol Infect*. 1998;**121**(2):381–6.
- 21 Day CA, Topp L, Iversen J, Maher L, Collaboration of Australian NSPs. Blood-borne virus prevalence and risk among steroid injectors: results from the Australian Needle and Syringe Program



1  
2  
3  
4  
5  
6  
7  
8  
9  
10  
11  
12  
13  
14  
15  
16  
17  
18  
19  
20  
21  
22  
23  
24  
25  
26  
27  
28  
29  
30  
31  
32  
33  
34  
35  
36  
37  
38  
39  
40  
41  
42  
43  
44  
45  
46  
47  
48  
49  
50  
51  
52  
53  
54  
55  
56  
57  
58  
59  
60

Survey. *Drug Alcohol Rev.* 2008;**27**(5):559–61.

22 Henrion R, Mandelbrot L, Delfieu D. Contamination par le VIH a la suite d'injections d'anabolisants. *Presse Med.* 1992;**21**(5):218.

23 Scott MJ, Scott MJ. HIV infection associated with injections of anabolic steroids. *JAMA.* 1989;**262**(2):207–8.

24 Rich JD, Dickinson BP, Merriman NA, Flanigan TP. Hepatitis C virus infection related to anabolic-androgenic steroid injection in a recreational weight lifter. *Am J Gastroenterol.* 1998;**93**(9):1598.

25 Sklarek HM, Mantovani RP, Erens E, *et al.* AIDS in a bodybuilder using anabolic steroids. *N Engl J Med.* 1984;**311**(26):1701.

26 Hope VD, Judd A, Hickman M, *et al.* HIV prevalence among injecting drug users in England and Wales 1990 to 2003: evidence for increased transmission in recent years. *AIDS.* 2005;**19**(11):1207–14.

27 Hope VD, Rogers PA, Jordan L, *et al.* Sustained increase in the sharing of needles and syringes among drug users in England and Wales. *AIDS.* 2002;**16**(18):2494–6.

28 Korkia P, Stimson G. Anabolic steroid use in Great Britain: An exploratory investigation. Final report to the Department of Health for England, Scotland and Wales. The Centre for Research on Drugs and Health Behaviour; 1993 Oct.

29 Lenehan P, Bellis MA, McVeigh J. A study of anabolic steroid use in the North West of England. *J Perform Enhanc Drugs.* 1996;**1**(2):57–70.

30 Pates R, Barry C. Steroid use in Cardiff: A problem for whom? *J Perform Enhanc Drugs.* 1996;**1**(3):92–7.

31 Burton C. Anabolic steroid use among the gym population in Clwyd. *Pharm J.* 1996;256:557–9.

32 Midgley S, Heather N, Best D, *et al.* Risk behaviours for HIV and hepatitis infection among anabolic-androgenic steroid users. *AIDS Care.* 2000;**12**(2):163–70.

33 Grace FM, Baker JS, Davies B. Anabolic androgenic steroid use in recreational gym users: a regional sample of the Mid-Glamorgan area. *J Subst Use.* 2001;**6**(3):189–95.

34 Bolding G, Sherr L, Maguire M, Elford J. HIV risk behaviours among gay men who use anabolic steroids. *Addiction.* 1999;**94**(12):1829–35.

35 Bolding G, Sherr L, Elford J. Use of anabolic steroids and associated health risks among gay men attending London gyms. *Addiction.* 2002;**97**(2):195–203.

36 Ip EJ, Barnett MJ, Tenerowicz MJ, Perry PJ. The anabolic 500 survey: characteristics of male users versus nonusers of anabolic-androgenic steroids for strength training. *Pharmacotherapy.* 2011;**31**(8):757–66.

37 Noone A, Durante AJ, Brady AR, *et al.* HIV infection in injecting drug users attending centres in England and Wales, 1990-1991. *AIDS.* 1993;**7**(11):1501–7.

38 Connell JA, Parry JV, Mortimer PP, Duncan J. Novel assay for the detection of immunoglobulin G antihuman immunodeficiency virus in untreated saliva and urine. *J Med Virol* 1993;**41**(2):159–64.

39 Judd A, Parry J, Hickman M, *et al.* Evaluation of a modified commercial assay in detecting antibody to hepatitis C virus in oral fluids and dried blood spots. *J Med Virol.* 2003;**71**(1):49–55.

40 Health Protection Agency, Health Protection Services and Microbiology Services. Unlinked Anonymous Monitoring Survey of People Who Inject Drugs in contact with specialist services: data tables. London: Health Protection Agency. 2012 July.

41 European Centre for Disease Prevention and Control. Hepatitis B and C in the EU neighbourhood: prevalence, burden of disease and screening policies. Stockholm: European Centre for Disease Prevention and Control; 2010 Sep.  
[www.ecdc.europa.eu/en/publications/Publications/TER\\_100914\\_Hep\\_B\\_C%20\\_EU\\_neighbourhood](http://www.ecdc.europa.eu/en/publications/Publications/TER_100914_Hep_B_C%20_EU_neighbourhood).

HIV and image & performance enhancing drug use.

25

pdf

42 Health Protection Agency. HIV in the United Kingdom: 2012 Report. Health Protection Services, Colindale; 2012 Nov.

43 Magnani R, Sabin K, Saidel T, Heckathorn D. Review of sampling hard-to-reach and hidden populations for HIV surveillance. *AIDS*. 2005;**19** Suppl 2:S67–72.

44 Latkin CA, Vlahov D, Anthony JC. Socially desirable responding and self-reported HIV infection risk behaviors among intravenous drug users. *Addiction*. 1993;**88**(4):517–26.

45 De Irala J, Bigelow C, McCusker J, *et al*. Reliability of self-reported human immunodeficiency virus risk behaviors in a residential drug treatment population. *Am J Epidemiol*. 1996;**143**(7):725–32.

46 Lloyd-Smith E, Kerr T, Hogg RS, *et al*. Prevalence and correlates of abscesses among a cohort of injection drug users. *Harm Reduct J*. 2005;**2**:24.

47 Spijkerman IJ, van Ameijden EJ, Mientjes GH, *et al*. Human immunodeficiency virus infection and other risk factors for skin abscesses and endocarditis among injection drug users. *J Clin Epidemiol*. 1996;**49**(10):1149–54.

48 Health Protection Agency, Health Protection Scotland, Public Health Wales, Public Health Agency Northern Ireland. Shooting Up: infections among people who inject drugs in the UK 2011. London: Health Protection Agency; 2012 Nov.

49 Grimes DA, Lopez LM, Gallo MF, *et al*. Steroid hormones for contraception in men. *Cochrane Database Syst Rev*. 2007;(2):CD004316.

50 Evans-Brown M, McVeigh J. Anabolic steroid use in the general population of the United Kingdom. In: Møller V, McNamee MJ, Dimeo P, editors. Elite sport, doping and public health. Syddansk: University Press of Southern Denmark; 2009. p. 75–97.

51 Bahrke MS, Yesalis CE. Abuse of anabolic androgenic steroids and related substances in sport and exercise. *Curr Opin Pharmacol*. 2004;**1**;4(6):614–20.



**Prevalence of, and risk factors for, HIV, hepatitis B and C infections among men who inject image and performance enhancing drugs.**

|                                 |                                                                                                                                                                                                                                                                                                                                                                                                                                                                                                                                                                                                                                                                                                                                                                                                                                                                                                                                                                                                                                                                                                                                                                                 |
|---------------------------------|---------------------------------------------------------------------------------------------------------------------------------------------------------------------------------------------------------------------------------------------------------------------------------------------------------------------------------------------------------------------------------------------------------------------------------------------------------------------------------------------------------------------------------------------------------------------------------------------------------------------------------------------------------------------------------------------------------------------------------------------------------------------------------------------------------------------------------------------------------------------------------------------------------------------------------------------------------------------------------------------------------------------------------------------------------------------------------------------------------------------------------------------------------------------------------|
| Journal:                        | <i>BMJ Open</i>                                                                                                                                                                                                                                                                                                                                                                                                                                                                                                                                                                                                                                                                                                                                                                                                                                                                                                                                                                                                                                                                                                                                                                 |
| Manuscript ID:                  | bmjopen-2013-003207.R1                                                                                                                                                                                                                                                                                                                                                                                                                                                                                                                                                                                                                                                                                                                                                                                                                                                                                                                                                                                                                                                                                                                                                          |
| Article Type:                   | Research                                                                                                                                                                                                                                                                                                                                                                                                                                                                                                                                                                                                                                                                                                                                                                                                                                                                                                                                                                                                                                                                                                                                                                        |
| Date Submitted by the Author:   | 25-Jun-2013                                                                                                                                                                                                                                                                                                                                                                                                                                                                                                                                                                                                                                                                                                                                                                                                                                                                                                                                                                                                                                                                                                                                                                     |
| Complete List of Authors:       | <p>Hope, Vivian; Public Health England, Centre for Infectious Disease Surveillance and Control; London School of Hygiene &amp; Tropical Medicine, Centre for Research on Drugs &amp; Health Behaviour</p> <p>McVeigh, Jim; Liverpool John Moores University, Centre for Public Health, Marongiu, Andrea; Public Health England, Centre for Infectious Disease Surveillance and Control</p> <p>Evans-Brown, Michael; European Monitoring Centre for Drugs and Drug Addiction,</p> <p>Smith, Josie; Public Health Wales,</p> <p>Kimergaard, Andreas; Aarhus University, Department of Public Health</p> <p>Scroxford, Sara; Public Health England, Centre for Infectious Disease Surveillance and Control</p> <p>Beynon, Caryl; Liverpool John Moores University, Centre for Public Health</p> <p>Parry, John; Public Health England, Centre for Infectious Disease Surveillance and Control; London School of Hygiene &amp; Tropical Medicine, Centre for Research on Drugs &amp; Health Behaviour</p> <p>Bellis, Mark; Liverpool John Moores, Centre for Public Health</p> <p>Ncube, Fortune; Public Health England, Centre for Infectious Disease Surveillance and Control</p> |
| <b>Primary Subject Heading</b>: | HIV/AIDS                                                                                                                                                                                                                                                                                                                                                                                                                                                                                                                                                                                                                                                                                                                                                                                                                                                                                                                                                                                                                                                                                                                                                                        |
| Secondary Subject Heading:      | Public health, Epidemiology, Addiction, Infectious diseases                                                                                                                                                                                                                                                                                                                                                                                                                                                                                                                                                                                                                                                                                                                                                                                                                                                                                                                                                                                                                                                                                                                     |
| Keywords:                       | Injecting drug use, Prevalence, Image and performance enhancing drugs, HIV, Viral hepatitis                                                                                                                                                                                                                                                                                                                                                                                                                                                                                                                                                                                                                                                                                                                                                                                                                                                                                                                                                                                                                                                                                     |
|                                 |                                                                                                                                                                                                                                                                                                                                                                                                                                                                                                                                                                                                                                                                                                                                                                                                                                                                                                                                                                                                                                                                                                                                                                                 |

SCHOLARONE™  
Manuscripts

HIV and image & performance enhancing drug use.

1

**Prevalence of, and risk factors for, HIV, hepatitis B and C infections among men who inject image and performance enhancing drugs.**

Vivian D HOPE<sup>1,2</sup>, Jim MCVEIGH<sup>3</sup>, Andrea MARONGIU<sup>1</sup>, Michael EVANS-BROWN<sup>4</sup>,  
Josie SMITH<sup>5</sup>, Andreas KIMERGÅRD<sup>6</sup>, Sara CROXFORD<sup>1</sup>, Caryl M BEYNON<sup>3</sup>, John V  
PARRY<sup>1,2</sup>, Mark A BELLIS<sup>3</sup>, Fortune NCUBE<sup>1</sup>.

1. *Public Health England, 61 Colindale Avenue, London NW9 5EQ, United Kingdom*
2. *Centre for Research on Drugs and Health Behaviour, London School of Hygiene & Tropical Medicine, Keppel Street, London WC1E 7HT, United Kingdom*
3. *Centre for Public Health, Liverpool John Moores University, Liverpool, L3 2ET, United Kingdom*
4. *European Monitoring Centre for Drugs and Drug Addiction, Cais do Sodré, 1249–289 Lisbon, Portugal*
5. *Public Health Wales, Temple of Peace & Health, Cathays Park, Cardiff, CF10 3NW, United Kingdom*
6. *Department of Public Health, Aarhus University, Bartholins Allé 2, DK-8000, Aarhus C, Denmark*

*Address for Correspondence:*

Vivian Hope  
Centre for Infectious Disease Surveillance and Control  
Public Health England  
61 Colindale Avenue  
LONDON NW9 5EQ  
United Kingdom  
Tel: +44 (0) 20 8327 7930

**Key Words:** Injecting drug use; prevalence; image and performance enhancing drugs; HIV; viral hepatitis.

**Word Count Abstract:** 298

**Word Count Manuscript:** 3,434

HIV and image & performance enhancing drug use.

2

## Abstract

*Background:* People who inject drugs' vulnerability to infection is widely recognised; however, studies have rarely focused on users of image and performance enhancing drugs (IPEDs). IPEDs can be used to change appearance for aesthetic reasons, as well as to improve performance. Needle and syringe programme (NSP) use by IPED injectors has grown substantially in the United Kingdom.

*Objective:* to describe drug use, sexual risks, and the prevalence of blood-borne viral infections among IPED injectors.

*Design/Setting/Participants:* A voluntary unlinked-anonymous cross-sectional behavioural survey of male IPED injectors using 19 NSPs.

*Results:* Of the 395 participants (median age 28 years), 36% had used IPEDs for <5 years. Anabolic steroids (86%), growth hormone (32%) and human chorionic gonadotropin (16%) were most frequently injected, with 88% injecting intramuscularly and 39% subcutaneously. Two-thirds also used IPEDs orally. Recent psychoactive drug use was common (46% cocaine, 12% amphetamine), 5% had ever injected a psychoactive drug, and 9% had shared injecting equipment. "Viagra/Cialis" was used by 7%; with 89% reporting anal/vaginal sex in the preceding year (20% had 5+ female-partners, 3% male-partners) with 13% always using condoms. Overall, 1.5% had HIV, 9% had antibodies to the hepatitis B core antigen (anti-HBc) and 5% to hepatitis C (anti-HCV). In multivariate analysis, having HIV was associated with: seeking advice from a sexual health clinic; having had an injection site abscess/wound, and having male-partners. After excluding those reporting male-partners or injecting psychoactive drugs, 0.8% had HIV, 8% anti-HBc, and 5% anti-HCV. Only 23% reported hepatitis B vaccine uptake, and diagnostic testing uptake was poor (31% HIV, 22% hepatitis C).

*Conclusions:* Previous prevalence studies had not found HIV among IPED injectors. HIV prevalence in this, the largest study of blood-borne viruses among IPED injectors, was

HIV and image & performance enhancing drug use.

3

1  
2  
3  
4  
5  
6  
7  
8  
9  
10  
11  
12  
13  
14  
15  
16  
17  
18  
19  
20  
21  
22  
23  
24  
25  
26  
27  
28  
29  
30  
31  
32  
33  
34  
35  
36  
37  
38  
39  
40  
41  
42  
43  
44  
45  
46  
47  
48  
49  
50  
51  
52  
53  
54  
55  
56  
57  
58  
59  
60

similar to that among injectors of psychoactive drugs. Findings indicate a need for targeted interventions.

For peer review only

HIV and image & performance enhancing drug use.

4

## Article summary

### Article focus:

- Over the last decade the number of men using needle and syringe programmes who report injecting image and performance enhancing drugs has risen in England and Wales; as a result there has been increased concern about the levels of blood-borne viral infections in this group.
- This study describes the nature of drug use and the risk behaviours in this population, as well as the prevalence of HIV, hepatitis B and C.

### Key messages:

- The overall prevalence of HIV among men injecting image and performance enhancing drugs was similar to that among those injecting psychoactive drugs in England & Wales. Previous prevalence studies of people who inject image and performance enhancing drugs had not detected HIV.
- When the results of this study are compared to those of a previous study undertaken in England & Wales in the mid-1990s, they suggest that the prevalence of hepatitis B infection among injectors of image and performance enhancing drugs *might* have increased over time.
- Sexual risk behaviours and psychoactive drug use were common among injectors of image and performance enhancing drugs, and the sharing of injecting equipment was also reported. The uptake of diagnostic testing for blood borne-viral infections and the vaccine against hepatitis B were low.

### Strengths and limitations of this study:

- This study recruited image and performance enhancing drugs users through needle and syringe programmes. Injectors of these drugs who are not in contact with these services may have a different risk profile and levels of infection.
- Oral-fluid testing was used to detect antibodies to HIV, hepatitis B and C; however, tests on these samples for both anti-HCV and anti-HBc have reduced sensitivity.

HIV and image & performance enhancing drug use.

5

1  
2  
3  
4  
5  
6  
7  
8  
9  
10  
11  
12  
13  
14  
15  
16  
17  
18  
19  
20  
21  
22  
23  
24  
25  
26  
27  
28  
29  
30  
31  
32  
33  
34  
35  
36  
37  
38  
39  
40  
41  
42  
43  
44  
45  
46  
47  
48  
49  
50  
51  
52  
53  
54  
55  
56  
57  
58  
59  
60

- This study is the largest of blood-borne viruses among men who inject image and performance enhancing drugs, however, the sample size still restricts its power. Consequently, caution is needed when attempting to generalise these findings.

For peer review only



HIV and image & performance enhancing drug use.

6

## INTRODUCTION

The vulnerability of people who inject drugs (PWID) to HIV and other infections is widely recognised; however, studies have focused on individuals who inject psychoactive drugs (such as opiates and stimulants) rather than those who inject drugs to enhance image and performance.[1,2,3,4] The number of injectors of image and performance enhancing drugs (IPEDs) in contact with needle and syringe programmes (NSPs) has grown substantially in the United Kingdom (UK);[5] and there has been increasing concern about the use of IPEDs and the associated harms in the UK and elsewhere.[3,5,6,7,8,9,10,11]

A range of illicit drugs can be injected with the aim of changing image and performance. These drugs range from tanning drugs, such as 'Melanotan-II',[12] to those used in body-building, such as human growth hormone.[3,13] The most commonly injected and studied IPEDs are anabolic steroids (AS).[3,5] IPEDs are taken both orally and by injection, with some predominantly injected and others taken only orally. Many users of these substances also take an array of different drugs.[3,5,14] The use, and particularly the injection of IPEDs has been associated with a range of harms including infections caused by bacteria[15,16,17,18,19] and blood borne viruses (BBVs).[6,20,21,22,23,24,25]

In England and Wales (E&W) surveillance of HIV and viral hepatitis among PWID is undertaken through an annual unlinked-anonymous survey[26,27] targeted at injectors of psychoactive drugs. A very small number of IPED injectors participated in this survey;[20] among the 149 sampled during the 1990s, 2% had antibodies to the hepatitis B core antigen (anti-HBc, a marker of having ever been infected with hepatitis B virus [HBV]) and none had antibodies to HIV (anti-HIV).[20] In a surveillance study of NSP clients in Australia, 1.6% (n=318) of those participating over a 10-year period reported steroid injection, with 10% having antibodies to hepatitis C virus (anti-HCV) and none

HIV and image & performance enhancing drug use.

7

1  
2  
3 anti-HIV.[21] Only one other survey of IPED injectors has collected biological samples;  
4 this study purposively recruited 63 AS injectors in Victoria, Australia, and found 12% had  
5 anti-HBc, 9.5% anti-HCV, and none anti-HIV.[6] A second Australian study found that  
6 half of IPED users sampled had ever experienced an injection-related health problem,  
7 with 6% having ever had an abscess.[8]  
8  
9  
10  
11  
12  
13

14  
15 A number of other UK studies have recruited IPED injectors – principally AS injectors –  
16 however, none of these collected biological samples. These studies were mostly small  
17 (N<100), and typically recruited through gyms,[28,29,30,31,32,33] with two recruiting gay  
18 men.[34,35] The prevalence of ever sharing injecting equipment in these studies ranged  
19 from 0.3% to 6%,[20,28,29,30,32] but in one it was 20%.[33] The sharing of drug vials  
20 was more common (2.4%[35]; 9.9%[34]; 23%[32]). Studies elsewhere have found similar  
21 levels of equipment sharing.[6,8] IPED users also report using psychoactive drugs,  
22 particularly stimulants, though the reported injection of psychoactive drugs is  
23 rare.[6,8,28,35,36] IPED users also tend to have more sexual partners than their  
24 comparison groups,[20,28] report risky sexual behaviours,[20,32] and low levels of  
25 condom use;[28,34] suggesting an elevated risk for HIV infection through sexual activity.  
26  
27  
28  
29  
30  
31  
32  
33  
34  
35  
36  
37  
38  
39

40 During 2010 and 2011, in response to the increasing concerns about IPED use, a  
41 targeted survey was undertaken as part of the on-going unlinked-anonymous survey of  
42 PWID. The aim of this survey was to describe the:- a) patterns of drug use and injecting  
43 risk; b) sexual behaviours; and c) BBV prevalence among IPED injectors. As far as we  
44 are aware this is the largest, and the first study outside of Australia, to purposively recruit  
45 IPED injectors to measure the prevalence of anti-HIV, anti-HBc and anti-HCV.  
46  
47  
48  
49  
50  
51  
52  
53  
54  
55  
56  
57  
58  
59  
60

HIV and image & performance enhancing drug use.

8

## METHODS

**Recruitment.** In E&W, PWID have been recruited into a voluntary unlinked-anonymous monitoring survey since 1990, methodological details of this cross-sectional survey have been published previously.[26,27,37] Briefly, agencies providing services to PWID (e.g. NSPs and addiction treatment) at sentinel locations throughout E&W invite clients who have ever injected to participate. Sentinel sites are selected so as to reflect both the geographic distribution and range of services offered to PWID. Those who consent to participate (overall refusal rate during 2010/11, 4.7%) provide a biological sample and self-complete a brief questionnaire focused on psychoactive drug use.[26,27,37] The survey has multi-site ethics approval. This study purposively recruited IPED injectors through 19 sites that provided NSP. Participants were recruited either when attending a NSP site or through outreach provision, they provided an oral-fluid sample and self-completed a short, specially developed, questionnaire focused on IPED use (types of drug used and routes of administration), related behaviours (injecting practices and sexual behaviours) and health service use.

**Laboratory methods.** Oral-fluid specimens were collected using the OraSure™ device (OraSure Technologies Inc, Pennsylvania, USA). These were tested for anti-HIV using an in-house GACELISA with similar performance to GACELISA HIV 1+2 (Abbott Murex Diagnostics Ltd, Dartford, UK). Reactive specimens underwent further testing according to a proven algorithm that included a second ELISA and Western Blot (sensitivity and specificity approaches 100%[38]). Anti-HCV testing employed a previously validated commercial enzyme-immunoassay (Ortho HCV 3.0 SAve, Ortho Diagnostics) with 92% sensitivity and 99% specificity,[39] and for anti-HBc an in-house IgG class-specific antibody capture EIA procedure was used, estimated sensitivity 75% and specificity 99% (JV Parry & A Judd, personal communication). Oral-fluid sample quality was verified by

HIV and image & performance enhancing drug use.

9

testing each one for the presence of a pre-determined minimum quantity of total IgG (1mg/litre) employing an in-house ELISA method.

**Analyses.** Descriptive analyses were undertaken first, then bivariate associations ( $p < 0.05$ ) between outcomes variables (anti-HIV, anti-HBc and anti-HCV positivity, equipment sharing and condom use) and co-variables (age, drug use, sexual practice, and health services use; table 1) were examined using Fisher's exact (when expected cell frequencies  $< 5$ ) and Pearson's Chi-square tests. Where possible associations were found ( $p < 0.10$ ) these were further examined via logistic regression models using forward stepwise procedures to select variables, with selection based on the likelihood ratio test ( $p < 0.05$ ). All analyses were undertaken using SPSS 19.

HIV and image & performance enhancing drug use.

10

## RESULTS

Between May 2010 and May 2011, 400 IPED injectors participated in this study; five (1.25%) women were excluded from the analyses (due to the small number). The participants characteristics and health service usage are summarised in table 1. Of those reporting their age (88%, n=347), a quarter (27%) were aged <25 years. During the preceding year, 45% had seen a General Practitioner and 28% had taken prescribed medication.

**Drug Use.** Details of the participants IPED use during the preceding year are given in table 1. AS were the mostly commonly injected IPED (86%), and over half also reported consuming these orally (57%); a third reported injecting growth hormone (32%), and almost a quarter using oral anti-oestrogens (23%). Overall 65% (n=252) had taken an IPED orally during the preceding year, with 58 (23%) of these having taken two types orally, and 85 (34%)  $\geq 3$  types. Most had injected only one type of IPED during the preceding year; however, 87 (22%) had injected two types and 58 (15%)  $\geq 3$  types. Considering both injecting and oral use, 71 (18%) had taken two types of IPED and 133 (34%)  $\geq 3$  during the preceding year.

Those who injected human growth hormone were more like to be older (aged >35 years) than those who had not (37% [47/128] vs. 22% [60/267],  $p < 0.001$ ); there were no other significant differences in the IPEDs used by age. During the preceding year most of the participants (74%) reported that they had usually injected themselves, and the majority (88%) had injected intramuscularly (table 1).

HIV and image & performance enhancing drug use.

11

**Table 1: Characteristics of male injectors of image and performance drugs (IPED).**

| Characteristics                                                  |              | n       |     | IPED use, last year                                            |                      | n     |     | Use of other illicit drugs                         |                       | n    |     |  |
|------------------------------------------------------------------|--------------|---------|-----|----------------------------------------------------------------|----------------------|-------|-----|----------------------------------------------------|-----------------------|------|-----|--|
| Age, years                                                       | Under 25     | 27%     | 106 | Years since first used a IPED                                  | 0 to 4               | 36%   | 141 | Ever injected illicit drug other than an IPED      |                       | 4.8% | 19  |  |
|                                                                  | 25 to 34     | 34%     | 134 |                                                                | 5 or more            | 32%   | 128 | Snorted cocaine, last year                         |                       | 46%  | 181 |  |
|                                                                  | 35 and over  | 27%     | 107 |                                                                | Median (IQR)         | 4 (8) |     | Snorted, drunk or swallowed amphetamine, last year |                       | 12%  | 47  |  |
|                                                                  | Median (IQR) | 28 (13) |     |                                                                | Not reported         | 32%   | 126 | <b>Injecting practice</b>                          |                       |      |     |  |
|                                                                  | Not reported | 12%     | 48  |                                                                | <i>IPED injected</i> |       |     |                                                    | Someone else          | 17%  | 68  |  |
| Had ever been in prison                                          |              | 16%     | 63  | Anabolic steroids                                              |                      | 86%   | 340 | Usually injected by, last year                     | Myself                | 74%  | 294 |  |
| <b>Health service use</b>                                        |              |         |     | Growth hormone                                                 |                      | 32%   | 128 | Not reported                                       |                       | 8.4% | 33  |  |
| Ever used a Needle and Syringe Programme                         |              | 75%     | 298 | Human chorionic gonadotropin (hCG)                             |                      | 16%   | 62  | Intramuscular injection, last year                 |                       | 88%  | 346 |  |
| Seen a General Practitioner about their health, last year        |              | 45%     | 178 | Insulin                                                        |                      | 5.6%  | 22  | Subcutaneous injection, last year                  |                       | 39%  | 154 |  |
| Sought advice at an Emergency / Minor injuries clinic, last year |              | 16%     | 64  | Melanotan I /II                                                |                      | 8.6%  | 34  | Ever shared needle, syringe or vial                |                       | 8.9% | 35  |  |
| Taken / used prescribed medication, last year                    |              | 28%     | 111 | Others (incl. EPO, IGF-1 and Nubain)                           |                      | 5.1%  | 20  | <b>Sexual Behaviour, last year</b>                 |                       |      |     |  |
| Sought advice from a sexual health / STI clinic, last year       |              | 17%     | 68  | <i>IPED taken orally</i>                                       |                      |       |     | Number of sexual partners                          | One                   | 38%  | 152 |  |
| Taken up offer of the vaccine against hepatitis B                |              | 23%     | 90  | Anabolic steroids                                              |                      | 57%   | 226 |                                                    | Two or more           | 47%  | 187 |  |
| Ever had a blood test for hepatitis C                            |              | 22%     | 85  | Anti-oestrogens                                                |                      | 23%   | 92  |                                                    | No sex / Not reported | 14%  | 56  |  |
| Ever had a blood test for HIV                                    |              | 31%     | 122 | Clenbuterol                                                    |                      | 15%   | 60  | Gender of sexual partners                          | Male partner(s)       | 3.3% | 13  |  |
| <b>Symptom of injury or infection at injection site</b>          |              |         |     | Ephedrine                                                      |                      | 20%   | 78  |                                                    | No male partners      | 82%  | 323 |  |
| Ever had redness at an injection site                            |              | 43%     | 168 | Thyroid hormones                                               |                      | 9%    | 37  | No sex / Not reported                              |                       | 15%  | 59  |  |
| Ever had an injection site abscess/sore/open wound               |              | 6.8%    | 27  | Phosphodiesterase type 5 inhibitors ("Viagra /Cialis")         |                      | 6.6%  | 26  | Always condom (anal / vaginal sex) or no sex       |                       | 20%  | 78  |  |
|                                                                  |              |         |     | Other (incl. diuretics, DNP, prohormones/designer supplements) |                      | 12%   | 46  |                                                    |                       |      |     |  |

Key. STI: sexually transmitted infection; EPO: ethryopoetin; IGF-1: insulin-like growth factor 1; Nubain: nalbuphine hydrochloride; DNP: 2,4-dinitrophenol.

HIV and image & performance enhancing drug use.

12

1  
2  
3  
4  
5  
6  
7  
8  
9  
10  
11  
12  
13  
14  
15  
16  
17  
18  
19  
20  
21  
22  
23  
24  
25  
26  
27  
28  
29  
30  
31  
32  
33  
34  
35  
36  
37  
38  
39  
40  
41  
42  
43  
44  
45  
46  
47  
48  
49  
50  
51  
52  
53  
54  
55  
56  
57  
58  
59  
60

The participant's also reported psychoactive drug use (table 1), with 46% snorting cocaine and 12% snorting, drinking or swallowing amphetamine during the preceding year. Ever having injected a psychoactive drug (including heroin and cocaine) was reported by 4.8% (table 1). Those who had injected a psychoactive drug were more likely to report injecting insulin as an IPED than those who had not (21% [4/19] vs. 4.8% [18/376],  $p=0.016$ ); there were no other significant differences in the IPEDs used between those who injected psychoactive drugs and those who had not.

Overall, 8.9% (95%CI 6.4%-12%) reported having ever shared a needle/syringe or drugs vial (table 1); 27 (6.8%) had just shared a vial, six (1.5%) had just shared a needle/syringe and two (0.51%) had shared both. Factors associated with sharing are summarised in table 2. In the multivariable analysis ever having shared a needle/syringe or drug vial was associated with having ever injected a psychoactive drug, having sought advice from a SH/STI clinic, subcutaneous injection, and having snorted, drunk or swallowed amphetamine (table 2).

**Sexual behaviour.** Nine-tenths (89%, 350/395) reported having anal or vaginal sex in the preceding year, and 9.1% (36/395) had  $\geq 10$  partners (table 1). Considering just female partners, 20% (80/395) of respondents had  $\geq 5$ . Thirteen (3.3%) reported  $\geq 1$  male sexual partners during the preceding year (table 1). Those reporting male sexual partners were older than those who did not (median age 38 years, IQR 12; and 28 years, IQR 11, respectively). Those reporting male sexual partners were also more likely to have ever injected a psychoactive drug (23% [3/13] vs. 4.2% [16/382],  $p=0.020$ ), more likely to report snorting, drinking, or swallowing amphetamine during the last year (46% [6/13] vs. 11% [41/382],  $p=0.002$ ), and a higher proportion reported snorting cocaine, but this was not significant (62% [8/13] vs. 45% [173/382],  $p=0.248$ ). Those reporting male sexual partners were also more likely to report having ever shared a needle/syringe or vial (25%

HIV and image & performance enhancing drug use.

13

1  
2  
3  
4 [4/13] vs. 8.1% [31/382],  $p=0.021$ ). A higher proportion of those reporting male sexual  
5  
6 partners reported always using condoms during the last year, but this difference was not  
7  
8 significant (38% [5/13] vs. 19% [73/382],  $p=0.146$ ). There were no differences in the  
9  
10 types of IPED used, nor in their routes of administration, between those reporting male  
11  
12 partners and those not.

13  
14  
15  
16 Among those who reported sex during the preceding year, 14% (95%CI 11%-18%,  
17  
18 48/350) had always used condoms. Factors associated with condom use are given in  
19  
20 table 2. Always using condoms among those who had had sex during the preceding year  
21  
22 was associated in the multivariable analysis with having had a male sexual partner and  
23  
24 having not snorted cocaine (table 2).

25  
26  
27  
28 **BBV prevalence.** Overall, 1.5% (95%CI 0.7%-3.3%;  $n=6$ ) had anti-HIV, 8.8% (95%CI  
29  
30 6.4%-12%) had ever been infected with hepatitis B (26 anti-HBc positive, adjusted for test  
31  
32 sensitivity of 0.75) and 5.5% (95%CI 3.7%-8.2%) with hepatitis C (20 anti-HCV positive,  
33  
34 adjusted for test sensitivity of 0.92). Covariates associated with anti-HIV, anti-HBc or  
35  
36 anti-HCV positivity are given in table 3. In the multivariable analysis, anti-HIV positivity  
37  
38 was associated with having male sexual partners in preceding year, ever having an  
39  
40 abscess/sore/open wound at injection site, and having sought advice from a SH/STI clinic  
41  
42 in the preceding year (table 3). Having anti-HBc was associated in the multivariable  
43  
44 analysis with having obtained advice from SH/STI clinic and having not injected  
45  
46 subcutaneously in the preceding year (table 3). Anti-HCV positivity was associated with  
47  
48 having ever injected a psychoactive drug and having taken a phosphodiesterase type 5  
49  
50 inhibitor (PDE5i) in the preceding year in the multivariable analysis (table 3).



HIV and image &amp; performance enhancing drug use.

14

**Table 2: Factors associated with risk behaviours among male injectors of image and performance drugs (IPED).**

|                                                           | Total                      | Yes       |         | Unadjusted odds ratio with 95% CI | Adjusted odds ratio with 95% CI |
|-----------------------------------------------------------|----------------------------|-----------|---------|-----------------------------------|---------------------------------|
| <b>Ever shared needle, syringe or vial</b>                | 395                        | 35 8.9%   |         |                                   |                                 |
| Number of sexual partners, last year                      | One                        | 152       | 8 5.3%  | 0.3 0.12 - 0.94                   | †                               |
|                                                           | Two or more                | 187       | 19 10%  | 0.7 0.28 - 1.6                    |                                 |
|                                                           | Not reported / No sex      | 56        | 8 14%   | 1.0                               |                                 |
|                                                           | <i>Pearson Chi-Square</i>  | <i>p=</i> | 0.088   |                                   |                                 |
| Gender of sexual partners, last year                      | Male partner(s)            | 13        | 4 31%   | 5.5 1.6 - 19                      | †                               |
|                                                           | No male partners           | 323       | 24 7.4% | 1.0                               |                                 |
|                                                           | Not reported / No sex      | 59        | 7 12%   | 1.7 0.69 - 4.1                    |                                 |
|                                                           | <i>Pearson Chi-Square</i>  | <i>p=</i> | 0.010   |                                   |                                 |
| Injected illicit other than IPED                          | Yes                        | 19        | 7 37%   | 7.2 2.6 - 20                      | 6.3 2.1 - 19                    |
|                                                           | No / Not reported          | 376       | 28 7.4% | 1.0                               | 1.0                             |
|                                                           | <i>Fisher's Exact Test</i> | <i>p=</i> | 0.001   |                                   |                                 |
| Sought advice from a sexual health /STI clinic, last year | Yes                        | 68        | 11 16%  | 2.4 1.1 - 5.2                     | 2.2 1.0 - 5.1                   |
|                                                           | No / Not sure              | 327       | 24 7.3% | 1.0                               | 1.0                             |
|                                                           | <i>Pearson Chi-Square</i>  | <i>p=</i> | 0.020   |                                   |                                 |
| Injected growth hormone (as IPED)                         | Yes                        | 128       | 18 14%  | 2.4 1.2 - 4.8                     | †                               |
|                                                           | No                         | 267       | 17 6.4% | 1.0                               |                                 |
|                                                           | <i>Pearson Chi-Square</i>  | <i>p=</i> | 0.012   |                                   |                                 |
| Injected insulin (as IPED)                                | Yes                        | 22        | 5 23%   | 3.4 1.2 - 9.8                     | †                               |
|                                                           | No                         | 373       | 30 8.0% | 1.0                               |                                 |
|                                                           | <i>Fisher's Exact Test</i> | <i>p=</i> | 0.035   |                                   |                                 |
| Subcutaneous injection, last year                         | Yes                        | 154       | 21 14%  | 2.6 1.3 - 5.2                     | 3.0 1.4 - 6.5                   |
|                                                           | No / Not sure              | 241       | 14 6%   | 1.0                               | 1.0                             |
|                                                           | <i>Pearson Chi-Square</i>  | <i>p=</i> | 0.008   |                                   |                                 |
| Snorted cocaine, last year                                | Yes                        | 181       | 22 12%  | 2.1 1.0 - 4.4                     | †                               |
|                                                           | No                         | 214       | 13 6.1% | 1.0                               |                                 |
|                                                           | <i>Pearson Chi-Square</i>  | <i>p=</i> | 0.034   |                                   |                                 |
| Snorted, drunk or swallowed amphetamine, last year        | Yes                        | 47        | 11 23%  | 4.1 1.9 - 9.1                     | 4.1 1.7 - 9.8                   |
|                                                           | No                         | 348       | 24 6.9% | 1.0                               | 1.0                             |
|                                                           | <i>Pearson Chi-Square</i>  | <i>p=</i> | 0.0002  |                                   |                                 |
| <b>Always used condom for anal / vaginal sex</b>          |                            |           |         |                                   |                                 |
|                                                           | 350                        | 48 14%    |         |                                   |                                 |
| Gender of sexual partners, last year                      | Male partner(s)            | 13        | 5 38%   | 8.1 0.8 - 83                      | 14 1.3 - 155                    |
|                                                           | No male partners           | 323       | 42 13%  | 1.9 0.25 - 15                     | 2.8 0.35 - 22                   |
|                                                           | Not reported               | 14        | 1 7.1%  | 1.0                               | 1.0                             |
|                                                           | <i>Pearson Chi-Square</i>  | <i>p=</i> | 0.025   |                                   |                                 |
| Ever had a blood test for hepatitis C                     | Yes                        | 82        | 17 21%  | 3.2 1.1 - 9                       | †                               |
|                                                           | No                         | 201       | 26 13%  | 1.8 0.68 - 5.0                    |                                 |
|                                                           | Not sure                   | 67        | 5 7.5%  | 1.0                               |                                 |
|                                                           | <i>Pearson Chi-Square</i>  | <i>p=</i> | 0.057   |                                   |                                 |
| Injected anabolic steroids                                | Yes                        | 304       | 46 15%  | 3.9 0.92 - 17                     | 4.2 0.96 - 18                   |
|                                                           | No                         | 46        | 2 4.3%  | 1.0                               | 1.0                             |
|                                                           | <i>Pearson Chi-Square</i>  | <i>p=</i> | 0.048   |                                   |                                 |
| Intramuscular injection, last year                        | Yes                        | 310       | 46 15%  | 3.3 0.77 - 14                     | †                               |
|                                                           | No / No sure               | 40        | 2 5.0%  | 1.0                               |                                 |
|                                                           | <i>Pearson Chi-Square</i>  | <i>p=</i> | 0.089   |                                   |                                 |
| Snorted cocaine, last year                                | Yes                        | 162       | 11 7%   | 0.3 0.1 - 0.6                     | 0.2 0.12 - 0.52                 |
|                                                           | No                         | 188       | 37 20%  | 1.0                               | 1.0                             |
|                                                           | <i>Pearson Chi-Square</i>  | <i>p=</i> | 0.0005  |                                   |                                 |

† Not in final model.

Key. STI: sexually transmitted infection.

HIV and image & performance enhancing drug use.

15

1  
2  
3  
4 After excluding those who reported either sex with men or ever injected a psychoactive  
5 drug, 0.8% had anti-HIV (95%CI 0.28%-2.4%, 3/366), 8.0% anti-HBc (95%CI 5.6%-11%,  
6 adjusted for test sensitivity, 22/366), and 4.7% anti-HCV (95%CI 2.9%-7.3%, adjusted for  
7 test sensitivity, 16/366); with 10% (95%CI 7.7%-14%, 38/366) having one or more of  
8 these three markers. In this group, having anti-HIV was found to be associated only with  
9 ever having had an abscess/wound at an injection site (8% [2/25] vs. 0.29% [1/341] for  
10 those who had not, p=0.013), and having anti-HBc was only associated with having  
11 sought advice from a SH/STI clinic in the preceding year (16% [9/56] vs. 4.2% [13/310]  
12 for those who had not, p=0.002). The use of three types IPEDs was associated with  
13 having anti-HCV: having taken a PDE5i (21% [5/24] vs. 3.2% [11/342] for those who had  
14 not, p=0.002); having injected insulin as IPED (18% [3/17] vs. 3.7% [13/349] for those  
15 who had not, p=0.032); and having injected a less commonly used IPED (17% [3/18] vs.  
16 3.7% [13/348] for those who had not, p=0.037).

17  
18  
19  
20  
21  
22  
23  
24  
25  
26  
27  
28  
29  
30  
31  
32 In total, 47 (12%, 95%CI 9.1%-15%;) were positive for one or more of anti-HIV, anti-HBc  
33 and anti-HCV, with 43 having just one of these markers and four having two or more of  
34 these markers. Two had both anti-HBc and anti-HCV, one of these reported injected  
35 psychoactive drugs, neither reported having had sex with men. One, who reported both  
36 sex with men and injecting psychoactive drugs, had both anti-HIV and anti-HBc; the  
37 remaining participant had all three markers and did not report with either sex with men or  
38 injecting psychoactive drugs.

39  
40  
41  
42  
43  
44  
45  
46  
47  
48 Uptake of interventions related to the three BBV infections was poor. Overall, only 23%  
49 reported receiving a dose of HBV vaccine, 31% ever having a diagnostic HIV test and  
50 22% having a HCV test (table 1).  
51  
52  
53  
54  
55  
56  
57  
58  
59  
60

HIV and image & performance enhancing drug use.

16

**Table 3: Factors associated with HIV, hepatitis B and C infection among male injectors of image and performance drugs (IPED).**

|                                                            |                                               | Total                      | Positive     |              | Unadjusted odds Ratio with 95% CI |      |       | Adjusted odds Ratio with 95% CI |  |  |
|------------------------------------------------------------|-----------------------------------------------|----------------------------|--------------|--------------|-----------------------------------|------|-------|---------------------------------|--|--|
| <b>HIV</b>                                                 |                                               | 395                        | 6            | 1.5%         |                                   |      |       |                                 |  |  |
| Age, years*                                                | Aged<35 or age unknown                        | 287                        | 1            | 0.3%         | 1.0                               |      |       | *                               |  |  |
|                                                            | Aged 35 or over                               | 102                        | 5            | 4.9%         | 14                                | 1.62 | - 122 |                                 |  |  |
|                                                            |                                               | <i>Fisher's Exact Test</i> | <i>p=</i>    | <i>0.006</i> |                                   |      |       |                                 |  |  |
| Gender of sexual partners last year*                       | Male sexual partner                           | 13                         | 3            | 23%          | 38 6.79 - 211                     |      |       |                                 |  |  |
|                                                            | No male partner reported/No sex               | 382                        | 3            | 0.8%         | 1.0                               |      |       |                                 |  |  |
|                                                            |                                               | <i>Fisher's Exact Test</i> | <i>p=</i>    | <i>0.001</i> |                                   |      |       |                                 |  |  |
| Gender of sexual partners last year and Age (in years)     | Male sexual partner                           | 13                         | 3            | 23%          | 85 8.13 - 893                     |      |       | 79 4.29 - 1,450                 |  |  |
|                                                            | No male partners, aged<35 or age not reported | 285                        | 1            | 0.4%         | 1.0                               |      |       | 1.0                             |  |  |
|                                                            | No male partners, aged 35 or over             | 97                         | 2            | 2.1%         | 6 0.54 - 67                       |      |       | 9 0.59 - 135                    |  |  |
|                                                            |                                               | <i>Pearson Chi-Square</i>  | <i>p&lt;</i> | <i>0.001</i> |                                   |      |       |                                 |  |  |
| Injected illicit other than PIED                           | Yes                                           | 19                         | 2            | 11%          | 11 1.87 - 64                      |      |       | †                               |  |  |
|                                                            | No / Not reported                             | 376                        | 4            | 1.1%         | 1.0                               |      |       |                                 |  |  |
|                                                            |                                               | <i>Fisher's Exact Test</i> | <i>p=</i>    | <i>0.029</i> |                                   |      |       |                                 |  |  |
| Ever had an abscess/sore/open wound at injection site      | Yes                                           | 27                         | 2            | 7.4%         | 7.3 1.27 - 42                     |      |       | 77 3.27 - 1,795                 |  |  |
|                                                            | No / Not sure                                 | 368                        | 4            | 1.1%         | 1.0                               |      |       | 1.0                             |  |  |
|                                                            |                                               | <i>Fisher's Exact Test</i> | <i>p=</i>    | <i>0.057</i> |                                   |      |       |                                 |  |  |
| Taken or used any prescribed medication in last year       | Yes                                           | 111                        | 5            | 4.5%         | 13 1.54 - 116                     |      |       | †                               |  |  |
|                                                            | No / Not sure                                 | 284                        | 1            | 0.4%         | 1.0                               |      |       |                                 |  |  |
|                                                            |                                               | <i>Fisher's Exact Test</i> | <i>p=</i>    | <i>0.008</i> |                                   |      |       |                                 |  |  |
| Sought advice from a sexual health /STI clinic, last year? | Yes                                           | 68                         | 4            | 5.9%         | 10 1.82 - 57                      |      |       | 24 1.03 - 542                   |  |  |
|                                                            | No / Not sure                                 | 327                        | 2            | 0.6%         | 1.0                               |      |       | 1.0                             |  |  |
|                                                            |                                               | <i>Fisher's Exact Test</i> | <i>p=</i>    | <i>0.009</i> |                                   |      |       |                                 |  |  |
| Have you ever been vaccinated against hepatitis B          | Yes                                           | 90                         | 4            | 4.4%         | 7.0 1.27 - 39                     |      |       | †                               |  |  |
|                                                            | No / Not sure                                 | 305                        | 2            | 0.7%         | 1.0                               |      |       |                                 |  |  |
|                                                            |                                               | <i>Fisher's Exact Test</i> | <i>p=</i>    | <i>0.026</i> |                                   |      |       |                                 |  |  |
| Have you ever had a blood test for hepatitis C             | Yes                                           | 81                         | 4            | 4.7%         | 7.6 1.37 - 42                     |      |       | †                               |  |  |
|                                                            | No / Not sure                                 | 308                        | 2            | 0.9%         | 1.0                               |      |       |                                 |  |  |
|                                                            |                                               | <i>Fisher's Exact Test</i> | <i>p=</i>    | <i>0.021</i> |                                   |      |       |                                 |  |  |
| Have you ever had a blood test for HIV?                    | Yes                                           | 122                        | 4            | 3.3%         | 4.6 0.83 - 25                     |      |       | †                               |  |  |
|                                                            | No / Not sure                                 | 273                        | 2            | 0.7%         | 1.0                               |      |       |                                 |  |  |
|                                                            |                                               | <i>Fisher's Exact Test</i> | <i>p=</i>    | <i>0.076</i> |                                   |      |       |                                 |  |  |
| Ever shared needle, syringe or vial                        | Yes                                           | 35                         | 2            | 5.7%         | 5.4 0.95 - 31                     |      |       | †                               |  |  |
|                                                            | No / Not sure                                 | 360                        | 4            | 1.1%         | 1.0                               |      |       |                                 |  |  |
|                                                            |                                               | <i>Fisher's Exact Test</i> | <i>p=</i>    | <i>0.091</i> |                                   |      |       |                                 |  |  |

\* Combined variable was entered into the final multivariate model due to an interaction between age and reporting male sexual partners: with 77% of those with male sexual partners aged over 35 years compared with 25% of those not reporting male sexual partners.

**Table 3 cont: Factors associated with HIV, hepatitis B and C infection among male injectors of image and performance drugs (IPED).**

|                                                               |                   | Total               | Positive |       | Unadjusted odds ratio with 95% CI |            | Adjusted odds ratio with 95% CI |            |
|---------------------------------------------------------------|-------------------|---------------------|----------|-------|-----------------------------------|------------|---------------------------------|------------|
| <b>Anti-HBc</b>                                               |                   | 395                 | 26       | 6.6%  |                                   |            |                                 |            |
| Sought advice from a sexual health /STI clinic, last year?    | Yes               | 68                  | 10       | 14.7% | 3.4                               | 1.4 – 7.7  | 3.8                             | 1.6 – 8.9  |
|                                                               | No / Not sure     | 327                 | 16       | 4.9%  | 1.0                               |            | 1.0                             |            |
|                                                               |                   | Fisher's Exact Test |          | p=    | 0.006                             |            |                                 |            |
| Subcutaneous injection, last year                             | Yes               | 154                 | 6        | 3.9%  | 1.0                               |            | 1.0                             |            |
|                                                               | No / Not sure     | 241                 | 20       | 8.3%  | 2.2                               | 0.88 – 5.7 | 2.6                             | 0.99 – 6.7 |
|                                                               |                   | Pearson Chi-Square  |          | p=    | 0.085                             |            |                                 |            |
| <b>Anti-HCV</b>                                               |                   | 395                 | 20       | 5.1%  |                                   |            |                                 |            |
| Age, years                                                    | Under25           | 106                 | 4        | 3.8%  | 1.0                               |            |                                 |            |
|                                                               | 25–34             | 134                 | 3        | 2.2%  | 0.58                              | 0.13 – 2.7 |                                 |            |
|                                                               | 35 and over       | 107                 | 10       | 9.3%  | 2.6                               | 0.80 – 8.7 |                                 | †          |
|                                                               | Not reported      | 48                  | 3        | 6.3%  | 1.7                               | 0.37 – 7.9 |                                 |            |
|                                                               |                   | Pearson Chi-Square  |          | p=    | 0.078                             |            |                                 |            |
| Injected illicit other than IPED                              | Yes               | 19                  | 3        | 15.8% | 4.0                               | 1.1 – 15   | 4.4                             | 1.1 – 17.2 |
|                                                               | No / Not reported | 376                 | 17       | 4.5%  | 1.0                               |            | 1.0                             |            |
|                                                               |                   | Fisher's Exact Test |          | p=    | 0.064                             |            |                                 |            |
| Taken or used any prescribed medication, last year            | Yes               | 111                 | 10       | 9.0%  | 2.7                               | 1.1 – 7    |                                 |            |
|                                                               | No / Not sure     | 284                 | 10       | 3.5%  | 1.0                               |            |                                 | †          |
|                                                               |                   | Pearson Chi-Square  |          | p=    | 0.025                             |            |                                 |            |
| Ever had a blood test for hepatitis C                         | Yes               | 85                  | 8        | 9.4%  | 1.7                               | 0.55 – 5.6 |                                 |            |
|                                                               | No                | 221                 | 7        | 3.2%  | 0.5                               | 0.17 – 1.8 |                                 | †          |
|                                                               | Not sure          | 89                  | 5        | 5.6%  | 1.0                               |            |                                 |            |
|                                                               |                   | Pearson Chi-Square  |          | p=    | 0.080                             |            |                                 |            |
| Taken Phosphodiesterase type 5 inhibitors ("Viagra / Cialis") | Yes               | 26                  | 5        | 19%   | 5.6                               | 1.9 – 17   | 6.0                             | 1.9 – 18   |
|                                                               | No                | 369                 | 15       | 4.1%  | 1.0                               |            | 1.0                             |            |
|                                                               |                   | Fisher's Exact Test |          | p=    | 0.007                             |            |                                 |            |
| Injected insulin (as IPED)                                    | Yes               | 22                  | 4        | 18%   | 5.0                               | 1.5 – 16   |                                 |            |
|                                                               | No                | 373                 | 16       | 4.3%  | 1.0                               |            |                                 | †          |
|                                                               |                   | Fisher's Exact Test |          | p=    | 0.019                             |            |                                 |            |
| Other injected IPED (incl. EPO, IGF-1 and Nubain)             | Yes               | 20                  | 3        | 15%   | 3.7                               | 0.99 – 14  |                                 |            |
|                                                               | No                | 375                 | 17       | 4.5%  | 1.0                               |            |                                 | †          |
|                                                               |                   | Fisher's Exact Test |          | p=    | 0.073                             |            |                                 |            |
| Ever shared needle, syringe or drug vial                      | Yes               | 35                  | 4        | 11%   | 2.8                               | 0.87 – 8.8 |                                 |            |
|                                                               | No / Not sure     | 360                 | 16       | 4%    | 1.0                               |            |                                 | †          |
|                                                               |                   | Fisher's Exact Test |          | p=    | 0.090                             |            |                                 |            |

† Not in final model.

Key. STI: sexually transmitted infection; EPO: erythropoietin; IGF-1: insulin-like growth factor 1; Nubain: nalbuphine hydrochloride.

## DISCUSSION

IPED injectors are at risk of infection with HIV as well as other BBVs. This is the first prevalence study to have found HIV among IPED injectors, with the prevalence at 1.5%, similar to that found among injectors of psychoactive drugs in England and Wales (1.2%,

HIV and image & performance enhancing drug use.

18

1  
2  
3  
4  
5  
6  
7  
8  
9  
10  
11  
12  
13  
14  
15  
16  
17  
18  
19  
20  
21  
22  
23  
24  
25  
26  
27  
28  
29  
30  
31  
32  
33  
34  
35  
36  
37  
38  
39  
40  
41  
42  
43  
44  
45  
46  
47  
48  
49  
50  
51  
52  
53  
54  
55  
56  
57  
58  
59  
60

2011[40]). However, anti-HBc and anti-HCV – at 8.8% and 5.5% respectively – are lower than among psychoactive drug injectors (16% and 43% respectively, 2011 [40]). The prevalence of all three BBVs in this sample would appear to be higher than that found in the general UK population.[41,42] Once those who reported either sex with men or injecting psychoactive drugs were excluded, 10% had been infected with one or more of HIV, hepatitis B and hepatitis C.

It is important to consider the limitations of this study. The comparative rarity, marginalisation and illicit nature of injecting drug use impede the construction of a sampling frame, making the representativeness of our sample impossible to measure. This study used an established methodology for recruiting PWID through specialist services;[26,27] however, the robustness of this approach for IPED injectors is unknown and cannot currently be assessed due to the very limited knowledge on the size and nature of this group.[3,5] The use of NSP to access this group was a pragmatic approach; community based recruitment approaches, such as Respondent Driven Sampling and Time-Location Sampling, that are often advocated for hard to reach populations[43] are possible alternatives. However, these are likely to be difficult to implement with this group due to the diversity of the drugs used, the clandestine and close-knit nature of this group and because use usually takes place in private settings (such as homes or gyms).[3,5] The findings here also rely on self-reported behaviours – though their reliability has not been assessed among IPED users, these have been found to be reliable for psychoactive drug injectors[44,45] - and infection with BBVs has been determined by laboratory-based biological data from the testing of oral-fluid samples. Whilst oral-fluid testing is highly sensitive for anti-HIV, the sensitivity is reduced for anti-HCV and anti-HBc.[39] Whilst this study is the largest of BBVs in this population, the sample size still restricts its power, and consequently caution is needed when attempting to generalise these findings to the wider population of IPED injectors.

HIV and image & performance enhancing drug use.

19

1  
2  
3  
4  
5  
6 The levels of HIV and anti-HBc are both higher than in the only previous UK study to  
7 measure these in IPED injectors. Undertaken >10 years ago using a similar  
8 methodology, this found no HIV and an anti-HBc prevalence of 2%;[20] suggesting that  
9 the prevalence of these infections among IPED injectors *might* have increased over time.  
10 Exposure to BBVs among IPED injectors appears to be associated with sexual risks and  
11 the injection of psychoactive drugs; although *injecting* psychoactive drugs is rare among  
12 IPED injectors, unprotected sex with multiple partners is common. The sharing of  
13 injecting equipment or drug vials among IPED injectors at 8.9% is much less common  
14 than among injectors of psychoactive drugs (in 2011, 37% of psychoactive drug injectors  
15 reported recently sharing injecting equipment[40]). Though exposure was not associated  
16 with sharing in the multivariate analyses in this study, BBV transmission through IPED  
17 injection cannot be excluded as this study may have lacked sufficient power to detect  
18 this.  
19  
20  
21  
22  
23  
24  
25  
26  
27  
28  
29  
30  
31  
32  
33

34 The associations between having HIV and the use of SH/STI clinics and having male  
35 sexual partners, suggest that HIV transmission among IPED injectors might be related to  
36 sexual activity. This association may reflect AS use by some HIV positive gay and  
37 bisexual men to mask the longer-term effects of HIV infection.[35] The association with  
38 having an abscess/wound at the injection site probably reflects the greater vulnerability of  
39 PWID with HIV to injection related bacterial infections.[46,47] The association between  
40 exposure to HBV and having obtained advice from a SH/STI clinic is again suggestive of  
41 a role for sexual risk in infection, particularly as sexual transmission is the main route by  
42 which the HBV is now acquired within the UK.[48] The association between having anti-  
43 HBc and not injecting subcutaneously suggests that certain patterns of IPED use might  
44 be related to increased risk; as some IPED are only injected subcutaneously and others  
45 only intramuscularly, and many users take several types.[3,8,12,13,14] Exposure to  
46  
47  
48  
49  
50  
51  
52  
53  
54  
55  
56  
57  
58  
59  
60

HIV and image & performance enhancing drug use.

20

1  
2  
3  
4  
5  
6  
7  
8  
9  
10  
11  
12  
13  
14  
15  
16  
17  
18  
19  
20  
21  
22  
23  
24  
25  
26  
27  
28  
29  
30  
31  
32  
33  
34  
35  
36  
37  
38  
39  
40  
41  
42  
43  
44  
45  
46  
47  
48  
49  
50  
51  
52  
53  
54  
55  
56  
57  
58  
59  
60

HCV, however, would appear to be associated with the injection of psychoactive drugs – an association that has been previously noted[6] - this finding might reflect more frequent injecting in this sub-group. Sexual activity may also play a role, assuming that the use of PDE5i is related to improving or maintaining sexual performance. These associations all require further investigation.

The level sharing found here was in-line with previous studies of injecting risk among IPED users.[20,28,29,30,32,33,35] The association between sharing and subcutaneous injection, suggests that sharing – like HBV exposure – may be associated with certain patterns of IPED use. As in previous studies of IPED injectors, sexual activity was common, and condom use was poor.[20,28,34] Condom use was higher among those with male sexual partners, and lower among those who reported snorting cocaine. The more frequent use of condoms by gay and bisexual men probably reflects awareness of their increased HIV risk.[42] The association with cocaine use might possibly be related to its use as a sexual stimulant, with this possibly related to attempts to counteract the reduced libido experienced on discontinuation of AS use or in the periods between courses of AS use ('off-cycles').[14] In part, this effect may be as a result of the decrease in endogenous testosterone production,[49] and is why IPEDs users self-treat with human chorionic gonadotrophin in an attempt to stimulate endogenous production, with PDE5i used to symptomatically treat erectile dysfunction.[5, 14,50] Increased libido following AS administration is also reported by users[14,33,34,51] with similar effects being reported following the use of drugs such as melanotan-II.[12]

Associations were found between psychoactive drug use and both sharing and poor condom use. IPED users who also use psychoactive drugs may be a higher risk – or perhaps less risk averse - sub-group. Whilst this needs further investigation, it suggests – considering the substantial levels of psychoactive drug use found here and in previous

HIV and image & performance enhancing drug use.

21

1  
2  
3 studies[6,8,28,35,36] – that those using both IPED and psychoactive drugs should be an  
4  
5 important target group for harm reduction interventions.  
6  
7

8  
9  
10 This study indicates that those providing services to PWID – particularly NSPs, outreach  
11 services and General Practitioners - should be alert to the needs of those who use  
12  
13 IPEDs. In particular, they need to be aware of the range drugs that may be used by this  
14  
15 group and of the associated injecting practices as these differ from those of psychoactive  
16  
17 drug injectors. Considering the BBV prevalence and levels risk found specialist services  
18  
19 for PWID need to both engage with IPED users and ensure that they have access to  
20  
21 appropriate injecting equipment and targeted harm reduction advice. They should also  
22  
23 ensure that this group has access to testing for BBVs, hepatitis B vaccinations, sexual  
24  
25 health services, and condoms.  
26  
27

28  
29  
30 Our findings suggest that sexual risk and the use, and particularly the injection, of  
31  
32 psychoactive drugs are possibly the most important factors associated with BBV  
33  
34 transmission among IPED injectors. The transmission of HIV and other BBV through the  
35  
36 injecting of IPED cannot be excluded, and this is certainly possible as equipment sharing  
37  
38 does occur. However, this study largely recruited through NSP providing injecting  
39  
40 equipment and advice. IPED injectors not in contact with NSP may have a different risk  
41  
42 profile and so infection risk. Even so, our findings suggest the need for targeted  
43  
44 interventions to address sexual health needs, psychoactive drug use, and the injection  
45  
46 practices among IPED injectors. Considering the limitations of this study, a larger study  
47  
48 recruiting from a wider range of settings and collecting dried-blood samples is needed to  
49  
50 more fully examine prevalence and, in particular, the associated risk factors, and so the  
51  
52 role of IPED injection in transmission of HIV and other BBVs.  
53  
54  
55  
56  
57  
58  
59  
60



HIV and image & performance enhancing drug use.

22

**Acknowledgements:** We are grateful to all of the people who inject image and performance enhancing drugs who have taken part in the survey and to the various services across the England and Wales who assisted with their recruitment. We would like to thank the support staff who worked on the survey and those who undertook the laboratory work. The survey is undertaken by the Health Protection Agency which is funded through the Department of Health.

*Contributions:* All authors contributed to the writing of the paper, with writing and analyses led by VH. MEB, AK, JM, AM and VH developed the modified questionnaire used with IPED injectors. AM undertook the day-to-day co-ordination the survey of IPED injectors, with support from MEB and VH. The on-going monitoring survey is managed by VH and FN. Development of the laboratory tests and processes employed was led by JP, who managed their application to this study.

*Funding.* This research received no specific grant from any funding agency in the public, commercial or not-for-profit sectors.

*Competing interests.* None.

## References

- 1 Aceijas C, Stimson GV, Hickman M, *et al*. Global overview of injecting drug use and HIV infection among injecting drug users. *AIDS*. 2004;**18**(17):2295–303.
- 2 Nelson PK, Mathers BM, Cowie B, *et al*. Global epidemiology of hepatitis B and hepatitis C in people who inject drugs: results of systematic reviews. *The Lancet*. 2011;**378**(9791):571–83.
- 3 Evans-Brown M, McVeigh J, Perkins C, Bellis MA. Human Enhancement Drugs: The Emerging Challenges to Public Health. Liverpool, North West Public Health Observatory, April 2012. ISBN: 978-1-908929-01-3
- 4 McVeigh J, Evans-Brown M, Bellis MA. Human enhancement drugs and the pursuit of perfection. *Adicciones*. 2012;**24**(3):185–90.
- 5 Advisory Council on the Misuse of Drugs. Consideration of the anabolic steroids. Home Office; 2010 September.
- 6 Iversen J, Topp L, Wand H, Maher L. Are people who inject performance and image-enhancing drugs an increasing population of Needle and Syringe Program attendees? *Drug Alcohol Rev*. 2012 Aug 29. doi: 10.1111/j.1465-3362.2012.00499.x.
- 7 Aitken C, Cheryl D, Kay S. Pumping iron, risking infection? Exposure to hepatitis C, hepatitis B and HIV among anabolic-androgenic steroid injectors in Victoria, Australia. *Drug Alcohol Depend*. 2002;**65**(3):303–8.
- 8 Larance B, Degenhardt L, Copeland J, Dillon P. Injecting risk behaviour and related harm among men who use performance- and image-enhancing drugs. *Drug Alcohol Rev*. 2008;**27**(6):679–86.
- 9 Christiansen AV. Testing citizens training recreationally in gyms. In: McNamee M, Møller V, editors. Doping and anti-doping policy in sport. Abingdon: Routledge; 2011. p. 126–41.
- 10 Mulcahey MK, Schiller JR, Hulstyn MJ. Anabolic steroid use in adolescents: identification of those at risk and strategies for prevention. *Phys Sportsmed*. 2010;**38**(3):105–13..
- 11 Castillo Castillo EM, Comstock RD. Prevalence of use of performance-enhancing substances among United States adolescents. *Pediatr Clin North Am*. 2007;**54**(4):663–75
- 12 Evans Evans-Brown M, Dawson RT, Chandler M, McVeigh J. Use of melanotan I and II in the general population. *BMJ*. 2009;**338**:b566.
- 13 Evans-Brown M, McVeigh J. Injecting human growth hormone as a performance-enhancing drug—perspectives from the United Kingdom. *J Subst Use*. 2009;**14**(5):267–88.
- 14 Llewellyn W. William Llewellyn's anabolics. 10 ed. Jupiter (FL): Molecular Nutrition; 2010.
- 15 Marquis CP, Maffulli N. Anabolic steroid related abscess—a risk worth taking? *Inj Extra*. 2006;**37**(12):451–4.
- 16 Gautschi OP, Zellweger R. Images in clinical medicine. Methicillin-resistant *Staphylococcus aureus* abscess after intramuscular steroid injection. *N Engl J Med*. 2006;**355**(7):713.
- 17 Dunn F. Two cases of biceps injury in bodybuilders with initially misleading presentation. *Emerg Med J*. 2002 Sep 1;**19**(5):461–2.
- 18 Al Al-Ismail K, Torreggiani WC, Munk PL, Nicolaou S. Gluteal mass in a bodybuilder: radiological depiction of a complication of anabolic steroid use. *Eur Radiol*. 2002 Jun 1;**12**(6):1366–9.
- 19 Evans NA. Local complications of self administered anabolic steroid injections. *Br J Sports Med*. 1997;**31**(4):349–50.
- 20 Crampin AC, Lamagni TL, Hope VD, *et al*. The risk of infection with HIV and hepatitis B in individuals who inject steroids in England and Wales. *Epidemiol Infect*. 1998;**121**(2):381–6.
- 21 Day CA, Topp L, Iversen J, Maher L, Collaboration of Australian NSPs. Blood-borne virus prevalence and risk among steroid injectors: results from the Australian Needle and Syringe Program

1  
2  
3  
4  
5  
6  
7  
8  
9  
10  
11  
12  
13  
14  
15  
16  
17  
18  
19  
20  
21  
22  
23  
24  
25  
26  
27  
28  
29  
30  
31  
32  
33  
34  
35  
36  
37  
38  
39  
40  
41  
42  
43  
44  
45  
46  
47  
48  
49  
50  
51  
52  
53  
54  
55  
56  
57  
58  
59  
60

Survey. *Drug Alcohol Rev.* 2008;**27**(5):559–61.

22 Henrion R, Mandelbrot L, Delfieu D. Contamination par le VIH a la suite d'injections d'anabolisants. *Presse Med.* 1992;**21**(5):218.

23 Scott MJ, Scott MJ. HIV infection associated with injections of anabolic steroids. *JAMA.* 1989;**262**(2):207–8.

24 Rich JD, Dickinson BP, Merriman NA, Flanigan TP. Hepatitis C virus infection related to anabolic-androgenic steroid injection in a recreational weight lifter. *Am J Gastroenterol.* 1998;**93**(9):1598.

25 Sklarek HM, Mantovani RP, Erens E, *et al.* AIDS in a bodybuilder using anabolic steroids. *N Engl J Med.* 1984;**311**(26):1701.

26 Hope VD, Judd A, Hickman M, *et al.* HIV prevalence among injecting drug users in England and Wales 1990 to 2003: evidence for increased transmission in recent years. *AIDS.* 2005;**19**(11):1207–14.

27 Hope VD, Rogers PA, Jordan L, *et al.* Sustained increase in the sharing of needles and syringes among drug users in England and Wales. *AIDS.* 2002;**16**(18):2494–6.

28 Korkia P, Stimson G. Anabolic steroid use in Great Britain: An exploratory investigation. Final report to the Department of Health for England, Scotland and Wales. The Centre for Research on Drugs and Health Behaviour; 1993 Oct.

29 Lenehan P, Bellis MA, McVeigh J. A study of anabolic steroid use in the North West of England. *J Perform Enhanc Drugs.* 1996;**1**(2):57–70.

30 Pates R, Barry C. Steroid use in Cardiff: A problem for whom? *J Perform Enhanc Drugs.* 1996;**1**(3):92–7.

31 Burton C. Anabolic steroid use among the gym population in Clwyd. *Pharm J.* 1996;**256**:557–9.

32 Midgley S, Heather N, Best D, *et al.* Risk behaviours for HIV and hepatitis infection among anabolic-androgenic steroid users. *AIDS Care.* 2000;**12**(2):163–70.

33 Grace FM, Baker JS, Davies B. Anabolic androgenic steroid use in recreational gym users: a regional sample of the Mid-Glamorgan area. *J Subst Use.* 2001;**6**(3):189–95.

34 Bolding G, Sherr L, Maguire M, Elford J. HIV risk behaviours among gay men who use anabolic steroids. *Addiction.* 1999;**94**(12):1829–35.

35 Bolding G, Sherr L, Elford J. Use of anabolic steroids and associated health risks among gay men attending London gyms. *Addiction.* 2002;**97**(2):195–203.

36 Ip EJ, Barnett MJ, Tenerowicz MJ, Perry PJ. The anabolic 500 survey: characteristics of male users versus nonusers of anabolic-androgenic steroids for strength training. *Pharmacotherapy.* 2011;**31**(8):757–66.

37 Noone A, Durante AJ, Brady AR, *et al.* HIV infection in injecting drug users attending centres in England and Wales, 1990-1991. *AIDS.* 1993;**7**(11):1501–7.

38 Connell JA, Parry JV, Mortimer PP, Duncan J. Novel assay for the detection of immunoglobulin G antihuman immunodeficiency virus in untreated saliva and urine. *J Med Virol* 1993;**41**(2):159–64.

39 Judd A, Parry J, Hickman M, *et al.* Evaluation of a modified commercial assay in detecting antibody to hepatitis C virus in oral fluids and dried blood spots. *J Med Virol.* 2003;**71**(1):49–55.

40 Health Protection Agency, Health Protection Services and Microbiology Services. Unlinked Anonymous Monitoring Survey of People Who Inject Drugs in contact with specialist services: data tables. London: Health Protection Agency. 2012 July.

41 European Centre for Disease Prevention and Control. Hepatitis B and C in the EU neighbourhood: prevalence, burden of disease and screening policies. Stockholm: European Centre for Disease Prevention and Control; 2010 Sep.  
[www.ecdc.europa.eu/en/publications/Publications/TER\\_100914\\_Hep\\_B\\_C%20\\_EU\\_neighbourhood](http://www.ecdc.europa.eu/en/publications/Publications/TER_100914_Hep_B_C%20_EU_neighbourhood).

HIV and image & performance enhancing drug use.

25

pdf

42 Health Protection Agency. HIV in the United Kingdom: 2012 Report. Health Protection Services, Colindale; 2012 Nov.

43 Magnani R, Sabin K, Saidel T, Heckathorn D. Review of sampling hard-to-reach and hidden populations for HIV surveillance. *AIDS*. 2005;**19** Suppl 2:S67–72.

44 Latkin CA, Vlahov D, Anthony JC. Socially desirable responding and self-reported HIV infection risk behaviors among intravenous drug users. *Addiction*. 1993;**88**(4):517–26.

45 De Irala J, Bigelow C, McCusker J, *et al*. Reliability of self-reported human immunodeficiency virus risk behaviors in a residential drug treatment population. *Am J Epidemiol*. 1996;**143**(7):725–32.

46 Lloyd-Smith E, Kerr T, Hogg RS, *et al*. Prevalence and correlates of abscesses among a cohort of injection drug users. *Harm Reduct J*. 2005;**2**:24.

47 Spijkerman IJ, van Ameijden EJ, Mientjes GH, *et al*. Human immunodeficiency virus infection and other risk factors for skin abscesses and endocarditis among injection drug users. *J Clin Epidemiol*. 1996;**49**(10):1149–54.

48 Health Protection Agency, Health Protection Scotland, Public Health Wales, Public Health Agency Northern Ireland. Shooting Up: infections among people who inject drugs in the UK 2011. London: Health Protection Agency; 2012 Nov.

49 Grimes DA, Lopez LM, Gallo MF, *et al*. Steroid hormones for contraception in men. *Cochrane Database Syst Rev*. 2007;(2):CD004316.

50 Evans-Brown M, McVeigh J. Anabolic steroid use in the general population of the United Kingdom. In: Møller V, McNamee MJ, Dimeo P, editors. Elite sport, doping and public health. Syddansk: University Press of Southern Denmark; 2009. p. 75–97.

51 Bahrke MS, Yesalis CE. Abuse of anabolic androgenic steroids and related substances in sport and exercise. *Curr Opin Pharmacol*. 2004;**1**;4(6):614–20.

HIV and image & performance enhancing drug use.

1

**Prevalence of, and risk factors for, HIV, hepatitis B and C infections among men who inject image and performance enhancing drugs.**

Vivian D HOPE<sup>1,2</sup>, Jim MCVEIGH<sup>3</sup>, Andrea MARONGIU<sup>1</sup>, Michael EVANS-BROWN<sup>4</sup>,  
Josie SMITH<sup>5</sup>, Andreas KIMERGÅRD<sup>6</sup>, Sara CROXFORD<sup>1</sup>, Caryl M BEYNON<sup>3</sup>, John V  
PARRY<sup>1,2</sup>, Mark A BELLIS<sup>3</sup>, Fortune NCUBE<sup>1</sup>.

1. *Public Health England, 61 Colindale Avenue, London NW9 5EQ, United Kingdom*
2. *Centre for Research on Drugs and Health Behaviour, London School of Hygiene & Tropical Medicine, Keppel Street, London WC1E 7HT, United Kingdom*
3. *Centre for Public Health, Liverpool John Moores University, Liverpool, L3 2ET, United Kingdom*
4. *European Monitoring Centre for Drugs and Drug Addiction, Cais do Sodré, 1249–289 Lisbon, Portugal*
5. *Public Health Wales, Temple of Peace & Health, Cathays Park, Cardiff, CF10 3NW, United Kingdom*
6. *Department of Public Health, Aarhus University, Bartholins Allé 2, DK-8000, Aarhus C, Denmark*

*Address for Correspondence:*

Vivian Hope  
Centre for Infectious Disease Surveillance and Control  
Public Health England  
61 Colindale Avenue  
LONDON NW9 5EQ  
United Kingdom  
Tel: +44 (0) 20 8327 7930

**Key Words:** Injecting drug use; prevalence; image and performance enhancing drugs; HIV; viral hepatitis.

**Word Count Abstract:** 298

**Word Count Manuscript:** 3,434

HIV and image & performance enhancing drug use.

2

## Abstract

*Background:* People who inject drugs' vulnerability to infection is widely recognised; however, studies have rarely focused on users of image and performance enhancing drugs (IPEDs). IPEDs can be used to change appearance for aesthetic reasons, as well as to improve performance. Needle and syringe programme (NSP) use by IPED injectors has grown substantially in the United Kingdom.

*Objective:* to describe drug use, sexual risks, and the prevalence of blood-borne viral infections among IPED injectors.

*Design/Setting/Participants:* A voluntary unlinked-anonymous cross-sectional bio-behavioural survey of male IPED injectors using 19 NSPs.

*Results:* Of the 395 participants (median age 28 years), 36% had used IPEDs for <5 years. Anabolic steroids (86%), growth hormone (32%) and human chorionic gonadotropin (16%) were most frequently injected, with 88% injecting intramuscularly and 39% subcutaneously. Two-thirds also used IPEDs orally. Recent psychoactive drug use was common (46% cocaine, 12% amphetamine), 5% had ever injected a psychoactive drug, and 9% had shared injecting equipment. "Viagra/Cialis" was used by 7%; with 89% reporting anal/vaginal sex in the preceding year (20% had 5+ female-partners, 3% male-partners) with 13% always using condoms. Overall, 1.5% had HIV, 9% had antibodies to the hepatitis B core antigen (anti-HBc) and 5% to hepatitis C (anti-HCV). In multivariate analysis, having HIV was associated with: seeking advice from a sexual health clinic; having had an injection site abscess/wound, and having male-partners. After excluding those reporting male-partners or injecting psychoactive drugs, 0.8% had HIV, 8% anti-HBc, and 5% anti-HCV. Only 23% reported hepatitis B vaccine uptake, and diagnostic testing uptake was poor (31% HIV, 22% hepatitis C).

*Conclusions:* Previous prevalence studies had not found HIV among IPED injectors. HIV prevalence in this, the largest study of blood-borne viruses among IPED injectors, was

HIV and image & performance enhancing drug use.

3

similar to that among injectors of psychoactive drugs. Findings indicate a need for targeted interventions.

For peer review only

HIV and image & performance enhancing drug use.

4

## Article summary

### Article focus:

- Over the last decade the number of men using needle and syringe programmes who report injecting image and performance enhancing drugs has risen in England and Wales; as a result there has been increased concern about the levels of blood-borne viral infections in this group.
- This study describes the nature of drug use and the risk behaviours in this population, as well as the prevalence of HIV, hepatitis B and C.

### Key messages:

- The overall prevalence of HIV among men injecting image and performance enhancing drugs was similar to that among those injecting psychoactive drugs in England & Wales. Previous prevalence studies of people who inject image and performance enhancing drugs had not detected HIV.
- When the results of this study are compared to those of a previous study undertaken in England & Wales in the mid-1990s, they suggest that the prevalence of hepatitis B infection among injectors of image and performance enhancing drugs *might* have increased over time.
- Sexual risk behaviours and psychoactive drug use were common among injectors of image and performance enhancing drugs, and the sharing of injecting equipment was also reported. The uptake of diagnostic testing for blood borne-viral infections and the vaccine against hepatitis B were low.

### Strengths and limitations of this study:

- This study recruited image and performance enhancing drugs users through needle and syringe programmes. Injectors of these drugs **who are** not in contact with these services may have a different risk profile and levels of infection.
- Oral-fluid testing was used to detect antibodies to HIV, hepatitis B and C; however, tests on these samples for both anti-HCV and anti-HBc have reduced sensitivity.



HIV and image & performance enhancing drug use.

5

- This study is the largest of blood-borne viruses among men who inject image and performance enhancing drugs, however, the sample size still restricts its power. Consequently, caution is needed when attempting to generalise these findings.

For peer review only

HIV and image & performance enhancing drug use.

6

## INTRODUCTION

The vulnerability of people who inject drugs (PWID) to HIV and other infections is widely recognised; however, studies have focused on individuals who inject psychoactive drugs (such as opiates and stimulants) rather than those who inject drugs to enhance image and performance.[1,2,3,4] The number of injectors of image and performance enhancing drugs (IPEDs) in contact with needle and syringe programmes (NSPs) has grown substantially in the United Kingdom (UK);[5] and there has been increasing concern about the use of IPEDs and the associated harms in the UK and elsewhere.[3,5,6,7,8,9,10,11]

A range of illicit drugs can be injected with the aim of changing image and performance. These drugs range from tanning drugs, such as 'Melanotan-II',[12] to those used in body-building, such as human growth hormone.[3,13] The most commonly injected and studied IPEDs are anabolic steroids (AS).[3,5] IPEDs are taken both orally and by injection, with some predominantly injected and others taken only orally. Many users of these substances also take an array of different drugs.[3,5,14] The use, and particularly the injection of IPEDs has been associated with a range of harms including infections caused by bacteria[15,16,17,18,19] and blood borne viruses (BBVs).[6,20,21,22,23,24,25]

In England and Wales (E&W) surveillance of HIV and viral hepatitis among PWID is undertaken through an annual unlinked-anonymous survey[26,27] targeted at injectors of psychoactive drugs. A very small number of IPED injectors participated in this survey;[20] among the 149 sampled during the 1990s, 2% had antibodies to the hepatitis B core antigen (anti-HBc, a marker of having ever been infected with hepatitis B virus [HBV]) and none had antibodies to HIV (anti-HIV).[20] In a surveillance study of NSP clients in Australia, 1.6% (n=318) of those participating over a 10-year period reported steroid injection, with 10% having antibodies to hepatitis C virus (anti-HCV) and none

HIV and image & performance enhancing drug use.

7

1  
2  
3 anti-HIV.[21] Only one other survey of IPED injectors has collected biological samples;  
4 this study purposively recruited 63 AS injectors in Victoria, Australia, and found 12% had  
5 anti-HBc, 9.5% anti-HCV, and none anti-HIV.[6] A second Australian study found that  
6 half of IPED users sampled had ever experienced an injection-related health problem,  
7 with 6% having ever had an abscess.[8]  
8  
9  
10  
11  
12  
13

14  
15  
16 A number of other UK studies have recruited IPED injectors – principally AS injectors –  
17 however, none of these collected biological samples. These studies were mostly small  
18 (N<100), and typically recruited through gyms,[28,29,30,31,32,33] with two recruiting gay  
19 men.[34,35] The prevalence of ever sharing injecting equipment in these studies ranged  
20 from 0.3% to 6%,[20,28,29,30,32] but in one it was 20%.[33] The sharing of drug vials  
21 was more common (2.4%[35]; 9.9%[34]; 23%[32]). Studies elsewhere have found similar  
22 levels of equipment sharing.[6,8] IPED users also report using psychoactive drugs,  
23 particularly stimulants, though the reported injection of psychoactive drugs is  
24 rare.[6,8,28,35,36] IPED users also tend to have more sexual partners than their  
25 comparison groups,[20,28] report risky sexual behaviours,[20,32] and low levels of  
26 condom use;[28,34] suggesting an elevated risk for HIV infection through sexual activity.  
27  
28  
29  
30  
31  
32  
33  
34  
35  
36  
37  
38  
39

40 During 2010 and 2011, in response to the increasing concerns about IPED use, a  
41 targeted survey was undertaken as part of the on-going unlinked-anonymous survey of  
42 PWID. The aim of this survey was to describe the:- a) patterns of drug use and injecting  
43 risk; b) sexual behaviours; and c) BBV prevalence among IPED injectors. As far as we  
44 are aware this is the largest, and the first study outside of Australia, to purposively recruit  
45 IPED injectors to measure the prevalence of anti-HIV, anti-HBc and anti-HCV.  
46  
47  
48  
49  
50  
51  
52  
53  
54  
55  
56  
57  
58  
59  
60

HIV and image & performance enhancing drug use.

8

## METHODS

**Recruitment.** In E&W, PWID have been recruited into a voluntary unlinked-anonymous monitoring survey since 1990, methodological details of this **cross-sectional survey** have been published previously.[26,27,37] Briefly, agencies providing services to PWID (e.g. NSPs and addiction treatment) at sentinel locations throughout E&W invite clients who have ever injected to participate. Sentinel sites are selected so as to reflect both the geographic distribution and range of services offered to PWID. Those **who consent to participate** (overall refusal rate during 2010/11, 4.7%) provide a biological sample and self-complete a brief questionnaire focused on psychoactive drug use.[26,27,37] **The survey has multi-site ethics approval.** This study purposively recruited IPED injectors through 19 sites that provided NSP. Participants were recruited either when attending a NSP site or through outreach provision, they provided an oral-fluid sample and self-completed a short, specially developed, questionnaire focused on IPED use (types of drug used and routes of administration), related behaviours (injecting practices and sexual behaviours) and health service use.

**Laboratory methods.** Oral-fluid specimens were collected using the OraSure™ device (OraSure Technologies Inc, Pennsylvania, USA). These were tested for anti-HIV using an in-house GACELISA with similar performance to GACELISA HIV 1+2 (Abbott Murex Diagnostics Ltd, Dartford, UK). Reactive specimens underwent further testing according to a proven algorithm that included a second ELISA and Western Blot (sensitivity and specificity approaches 100%[38]). Anti-HCV testing employed a previously validated commercial enzyme-immunoassay (Ortho HCV 3.0 SAve, Ortho Diagnostics) with 92% sensitivity and 99% specificity,[39] and for anti-HBc an in-house IgG class-specific antibody capture EIA procedure was used, estimated sensitivity 75% and specificity 99% (JV Parry & A Judd, personal communication). Oral-fluid sample quality was verified by

HIV and image & performance enhancing drug use.

9

testing each one for the presence of a pre-determined minimum quantity of total IgG (1mg/litre) employing an in-house ELISA method.

**Analyses.** Descriptive analyses were undertaken first, then bivariate associations ( $p < 0.05$ ) between outcomes variables (anti-HIV, anti-HBc and anti-HCV positivity, equipment sharing and condom use) and co-variables (age, drug use, sexual practice, and health services use; table 1) were examined using Fisher's exact (when expected cell frequencies  $< 5$ ) and Pearson's Chi-square tests. Where possible associations were found ( $p < 0.10$ ) these were further examined via logistic regression models using forward stepwise procedures to select variables, with selection based on the likelihood ratio test ( $p < 0.05$ ). All analyses were undertaken using SPSS 19.

HIV and image & performance enhancing drug use.

10

## RESULTS

Between May 2010 and May 2011, 400 IPED injectors participated in this study; five (1.25%) women were excluded from the analyses (due to the small number). The participants characteristics and health service usage are summarised in table 1. Of those reporting their age (88%, n=347), a quarter (27%) were aged <25 years. During the preceding year, 45% had seen a General Practitioner and 28% had taken prescribed medication.

**Drug Use.** Details of the participants IPED use during the preceding year are given in table 1. AS were the mostly commonly injected IPED (86%), and over half also reported consuming these orally (57%); a third reported injecting growth hormone (32%), and almost a quarter using oral anti-oestrogens (23%). Overall 65% (n=252) had taken an IPED orally during the preceding year, with 58 (23%) of these having taken two types orally, and 85 (34%)  $\geq 3$  types. Most had injected only one type of IPED during the preceding year; however, 87 (22%) had injected two types and 58 (15%)  $\geq 3$  types. Considering both injecting and oral use, 71 (18%) had taken two types of IPED and 133 (34%)  $\geq 3$  during the preceding year.

Those who injected human growth hormone were more like to be older (aged >35 years) than those who had not (37% [47/128] vs. 22% [60/267],  $p < 0.001$ ); there were no other significant differences in the IPEDs used by age. During the preceding year most of the participants (74%) reported that they had usually injected themselves, and the majority (88%) had injected intramuscularly (table 1).

HIV and image &amp; performance enhancing drug use.

11

**Table 1: Characteristics of male injectors of image and performance drugs (IPED).**

| Characteristics                                                  |              | n       |     | IPED use, last year                                            |                      | n     |     | Use of other illicit drugs                         |                                | n               |              |      |     |
|------------------------------------------------------------------|--------------|---------|-----|----------------------------------------------------------------|----------------------|-------|-----|----------------------------------------------------|--------------------------------|-----------------|--------------|------|-----|
| Age, years                                                       | Under 25     | 27%     | 106 | Years since first used a IPED                                  | 0 to 4               | 36%   | 141 | Ever injected illicit drug other than an IPED      |                                | 4.8%            | 19           |      |     |
|                                                                  | 25 to 34     | 34%     | 134 |                                                                | 5 or more            | 32%   | 128 | Snorted cocaine, last year                         |                                | 46%             | 181          |      |     |
|                                                                  | 35 and over  | 27%     | 107 |                                                                | Median (IQR)         | 4 (8) |     | Snorted, drunk or swallowed amphetamine, last year |                                | 12%             | 47           |      |     |
|                                                                  | Median (IQR) | 28 (13) |     |                                                                | Not reported         | 32%   | 126 | <b>Injecting practice</b>                          |                                |                 |              |      |     |
|                                                                  | Not reported | 12%     | 48  |                                                                | <i>IPED injected</i> |       |     |                                                    | Usually injected by, last year |                 | Someone else | 17%  | 68  |
| Had ever been in prison                                          |              | 16%     | 63  | Anabolic steroids                                              |                      | 86%   | 340 | Myself                                             |                                | 74%             | 294          |      |     |
| <b>Health service use</b>                                        |              |         |     | Growth hormone                                                 |                      | 32%   | 128 | Not reported                                       |                                | 8.4%            | 33           |      |     |
| Ever used a Needle and Syringe Programme                         |              | 75%     | 298 | Human chorionic gonadotropin (hCG)                             |                      | 16%   | 62  | Intramuscular injection, last year                 |                                |                 |              | 88%  | 346 |
| Seen a General Practitioner about their health, last year        |              | 45%     | 178 | Insulin                                                        |                      | 5.6%  | 22  | Subcutaneous injection, last year                  |                                |                 |              | 39%  | 154 |
| Sought advice at an Emergency / Minor injuries clinic, last year |              | 16%     | 64  | Melanotan I /II                                                |                      | 8.6%  | 34  | Ever shared needle, syringe or vial                |                                |                 |              | 8.9% | 35  |
| Taken / used prescribed medication, last year                    |              | 28%     | 111 | Others (incl. EPO, IGF-1 and Nubain)                           |                      | 5.1%  | 20  | <b>Sexual Behaviour, last year</b>                 |                                |                 |              |      |     |
| Sought advice from a sexual health / STI clinic, last year       |              | 17%     | 68  | <i>IPED taken orally</i>                                       |                      |       |     | Number of sexual partners                          |                                | One             | 38%          | 152  |     |
| Taken up offer of the vaccine against hepatitis B                |              | 23%     | 90  | Anabolic steroids                                              |                      | 57%   | 226 | Two or more                                        |                                | 47%             | 187          |      |     |
| Ever had a blood test for hepatitis C                            |              | 22%     | 85  | Anti-oestrogens                                                |                      | 23%   | 92  | No sex / Not reported                              |                                | 14%             | 56           |      |     |
| Ever had a blood test for HIV                                    |              | 31%     | 122 | Clenbuterol                                                    |                      | 15%   | 60  | Gender of sexual partners                          |                                | Male partner(s) | 3.3%         | 13   |     |
| <b>Symptom of injury or infection at injection site</b>          |              |         |     | Ephedrine                                                      |                      | 20%   | 78  | No male partners                                   |                                | 82%             | 323          |      |     |
| Ever had redness at an injection site                            |              | 43%     | 168 | Thyroid hormones                                               |                      | 9%    | 37  | No sex / Not reported                              |                                | 15%             | 59           |      |     |
| Ever had an injection site abscess/sore/open wound               |              | 6.8%    | 27  | Phosphodiesterase type 5 inhibitors ("Viagra /Cialis")         |                      | 6.6%  | 26  | Always condom (anal / vaginal sex) or no sex       |                                |                 |              | 20%  | 78  |
|                                                                  |              |         |     | Other (incl. diuretics, DNP, prohormones/designer supplements) |                      | 12%   | 46  |                                                    |                                |                 |              |      |     |

Key. STI: sexually transmitted infection; EPO: ethryopoetin; IGF-1: insulin-like growth factor 1; Nubain: nalbuphine hydrochloride; DNP: 2,4-dinitrophenol.

HIV and image & performance enhancing drug use.

12

1  
2  
3  
4 The participant's also reported psychoactive drug use (table 1), with 46% snorting  
5 cocaine and 12% snorting, drinking or swallowing amphetamine during the preceding  
6 year. Ever having injected a psychoactive drug (including heroin and cocaine) was  
7 reported by 4.8% (table 1). Those who had injected a psychoactive drug were more likely  
8 to report injecting insulin as an IPED than those who had not (21% [4/19] vs. 4.8%  
9 [18/376],  $p=0.016$ ); there were no other significant differences in the IPEDs used between  
10 those who injected psychoactive drugs and those who had not.

11  
12  
13  
14 Overall, 8.9% (95%CI 6.4%-12%) reported having ever shared a needle/syringe or drugs  
15 vial (table 1); 27 (6.8%) had just shared a vial, six (1.5%) had just shared a  
16 needle/syringe and two (0.51%) had shared both. Factors associated with sharing are  
17 summarised in table 2. In the multivariable analysis ever having shared a needle/syringe  
18 or drug vial was associated with having ever injected a psychoactive drug, having sought  
19 advice from a SH/STI clinic, subcutaneous injection, and having snorted, drunk or  
20 swallowed amphetamine (table 2).

21  
22  
23  
24  
25  
26  
27  
28  
29  
30  
31  
32  
33  
34  
35  
36 **Sexual behaviour.** Nine-tenths (89%, 350/395) reported having anal or vaginal sex in the  
37 preceding year, and 9.1% (36/395) had  $\geq 10$  partners (table 1). Considering just female  
38 partners, 20% (80/395) of respondents had  $\geq 5$ . Thirteen (3.3%) reported  $\geq 1$  male sexual  
39 partners during the preceding year (table 1). Those reporting male sexual partners were  
40 older than those who did not (median age 38 years, IQR 12; and 28 years, IQR 11,  
41 respectively). Those reporting male sexual partners were also more likely to have ever  
42 injected a psychoactive drug (23% [3/13] vs. 4.2% [16/382],  $p=0.020$ ), more likely to  
43 report snorting, drinking, or swallowing amphetamine during the last year (46% [6/13] vs.  
44 11% [41/382],  $p=0.002$ ), and a higher proportion reported snorting cocaine, but this was  
45 not significant (62% [8/13] vs. 45% [173/382],  $p=0.248$ ). Those reporting male sexual  
46 partners were also more likely to report having ever shared a needle/syringe or vial (25%



HIV and image & performance enhancing drug use.

13

1  
2  
3  
4 [4/13] vs. 8.1% [31/382],  $p=0.021$ ). A higher proportion of those reporting male sexual  
5  
6 partners reported always using condoms during the last year, but this difference was not  
7  
8 significant (38% [5/13] vs. 19% [73/382],  $p=0.146$ ). There were no differences in the  
9  
10 types of IPED used, nor in their routes of administration, between those reporting male  
11  
12 partners and those not.

13  
14  
15  
16 Among those who reported sex during the preceding year, 14% (95%CI 11%-18%,  
17  
18 48/350) had always used condoms. **Factors associated with condom use are given in**  
19  
20 **table 2.** Always using condoms among those who had had sex during the preceding year  
21  
22 was associated in the multivariable analysis with having had a male sexual partner and  
23  
24 having not snorted cocaine (table 2).

25  
26  
27  
28 **BBV prevalence.** Overall, 1.5% (95%CI 0.7%-3.3%;  $n=6$ ) had anti-HIV, 8.8% (95%CI  
29  
30 6.4%-12%) had ever been infected with hepatitis B (26 anti-HBc positive, adjusted for test  
31  
32 sensitivity of 0.75) and 5.5% (95%CI 3.7%-8.2%) with hepatitis C (20 anti-HCV positive,  
33  
34 adjusted for test sensitivity of 0.92). **Covariates associated with anti-HIV, anti-HBc or**  
35  
36 **anti-HCV positivity are given in table 3.** In the multivariable analysis, anti-HIV positivity  
37  
38 was associated with having male sexual partners in preceding year, ever having an  
39  
40 abscess/sore/open wound at injection site, and having sought advice from a SH/STI clinic  
41  
42 in the preceding year (table 3). Having anti-HBc was associated in the multivariable  
43  
44 analysis with having obtained advice from SH/STI clinic and having not injected  
45  
46 subcutaneously in the preceding year (table 3). Anti-HCV positivity was associated with  
47  
48 having ever injected a psychoactive drug and having taken a phosphodiesterase type 5  
49  
50 inhibitor (PDE5i) in the preceding year in the multivariable analysis (table 3).  
51  
52  
53  
54  
55  
56  
57  
58  
59  
60

**Table 2: Factors associated with risk behaviours among male injectors of image and performance drugs (IPED).**

|                                                           | Total                      | Yes       |               | Unadjusted odds ratio with 95% CI | Adjusted odds ratio with 95% CI |
|-----------------------------------------------------------|----------------------------|-----------|---------------|-----------------------------------|---------------------------------|
| <b>Ever shared needle, syringe or vial</b>                | 395                        | 35 8.9%   |               |                                   |                                 |
| Number of sexual partners, last year                      | One                        | 152       | 8 5.3%        | 0.3 0.12 - 0.94                   | †                               |
|                                                           | Two or more                | 187       | 19 10%        | 0.7 0.28 - 1.6                    |                                 |
|                                                           | Not reported / No sex      | 56        | 8 14%         | 1.0                               |                                 |
|                                                           | <i>Pearson Chi-Square</i>  | <i>p=</i> | <i>0.088</i>  |                                   |                                 |
| Gender of sexual partners, last year                      | Male partner(s)            | 13        | 4 31%         | 5.5 1.6 - 19                      | †                               |
|                                                           | No male partners           | 323       | 24 7.4%       | 1.0                               |                                 |
|                                                           | Not reported / No sex      | 59        | 7 12%         | 1.7 0.69 - 4.1                    |                                 |
|                                                           | <i>Pearson Chi-Square</i>  | <i>p=</i> | <i>0.010</i>  |                                   |                                 |
| Injected illicit other than IPED                          | Yes                        | 19        | 7 37%         | 7.2 2.6 - 20                      | 6.3 2.1 - 19                    |
|                                                           | No / Not reported          | 376       | 28 7.4%       | 1.0                               | 1.0                             |
|                                                           | <i>Fisher's Exact Test</i> | <i>p=</i> | <i>0.001</i>  |                                   |                                 |
| Sought advice from a sexual health /STI clinic, last year | Yes                        | 68        | 11 16%        | 2.4 1.1 - 5.2                     | 2.2 1.0 - 5.1                   |
|                                                           | No / Not sure              | 327       | 24 7.3%       | 1.0                               | 1.0                             |
|                                                           | <i>Pearson Chi-Square</i>  | <i>p=</i> | <i>0.020</i>  |                                   |                                 |
| Injected growth hormone (as IPED)                         | Yes                        | 128       | 18 14%        | 2.4 1.2 - 4.8                     | †                               |
|                                                           | No                         | 267       | 17 6.4%       | 1.0                               |                                 |
|                                                           | <i>Pearson Chi-Square</i>  | <i>p=</i> | <i>0.012</i>  |                                   |                                 |
| Injected insulin (as IPED)                                | Yes                        | 22        | 5 23%         | 3.4 1.2 - 9.8                     | †                               |
|                                                           | No                         | 373       | 30 8.0%       | 1.0                               |                                 |
|                                                           | <i>Fisher's Exact Test</i> | <i>p=</i> | <i>0.035</i>  |                                   |                                 |
| Subcutaneous injection, last year                         | Yes                        | 154       | 21 14%        | 2.6 1.3 - 5.2                     | 3.0 1.4 - 6.5                   |
|                                                           | No / Not sure              | 241       | 14 6%         | 1.0                               | 1.0                             |
|                                                           | <i>Pearson Chi-Square</i>  | <i>p=</i> | <i>0.008</i>  |                                   |                                 |
| Snorted cocaine, last year                                | Yes                        | 181       | 22 12%        | 2.1 1.0 - 4.4                     | †                               |
|                                                           | No                         | 214       | 13 6.1%       | 1.0                               |                                 |
|                                                           | <i>Pearson Chi-Square</i>  | <i>p=</i> | <i>0.034</i>  |                                   |                                 |
| Snorted, drunk or swallowed amphetamine, last year        | Yes                        | 47        | 11 23%        | 4.1 1.9 - 9.1                     | 4.1 1.7 - 9.8                   |
|                                                           | No                         | 348       | 24 6.9%       | 1.0                               | 1.0                             |
|                                                           | <i>Pearson Chi-Square</i>  | <i>p=</i> | <i>0.0002</i> |                                   |                                 |
| <b>Always used condom for anal / vaginal sex</b>          | 350                        | 48 14%    |               |                                   |                                 |
| Gender of sexual partners, last year                      | Male partner(s)            | 13        | 5 38%         | 8.1 0.8 - 83                      | 14 1.3 - 155                    |
|                                                           | No male partners           | 323       | 42 13%        | 1.9 0.25 - 15                     | 2.8 0.35 - 22                   |
|                                                           | Not reported               | 14        | 1 7.1%        | 1.0                               | 1.0                             |
|                                                           | <i>Pearson Chi-Square</i>  | <i>p=</i> | <i>0.025</i>  |                                   |                                 |
| Ever had a blood test for hepatitis C                     | Yes                        | 82        | 17 21%        | 3.2 1.1 - 9                       | †                               |
|                                                           | No                         | 201       | 26 13%        | 1.8 0.68 - 5.0                    |                                 |
|                                                           | Not sure                   | 67        | 5 7.5%        | 1.0                               |                                 |
|                                                           | <i>Pearson Chi-Square</i>  | <i>p=</i> | <i>0.057</i>  |                                   |                                 |
| Injected anabolic steroids                                | Yes                        | 304       | 46 15%        | 3.9 0.92 - 17                     | 4.2 0.96 - 18                   |
|                                                           | No                         | 46        | 2 4.3%        | 1.0                               | 1.0                             |
|                                                           | <i>Pearson Chi-Square</i>  | <i>p=</i> | <i>0.048</i>  |                                   |                                 |
| Intramuscular injection, last year                        | Yes                        | 310       | 46 15%        | 3.3 0.77 - 14                     | †                               |
|                                                           | No / No sure               | 40        | 2 5.0%        | 1.0                               |                                 |
|                                                           | <i>Pearson Chi-Square</i>  | <i>p=</i> | <i>0.089</i>  |                                   |                                 |
| Snorted cocaine, last year                                | Yes                        | 162       | 11 7%         | 0.3 0.1 - 0.6                     | 0.2 0.12 - 0.52                 |
|                                                           | No                         | 188       | 37 20%        | 1.0                               | 1.0                             |
|                                                           | <i>Pearson Chi-Square</i>  | <i>p=</i> | <i>0.0005</i> |                                   |                                 |

† Not in final model.

Key. STI: sexually transmitted infection.

HIV and image & performance enhancing drug use.

15

1  
2  
3  
4 After excluding those who reported either sex with men or ever injected a psychoactive  
5 drug, 0.8% had anti-HIV (95%CI 0.28%-2.4%, 3/366), 8.0% anti-HBc (95%CI 5.6%-11%,  
6 adjusted for test sensitivity, 22/366), and 4.7% anti-HCV (95%CI 2.9%-7.3%, adjusted for  
7 test sensitivity, 16/366); with 10% (95%CI 7.7%-14%, 38/366) having one or more of  
8 these three markers. In this group, having anti-HIV was found to be associated only with  
9 ever having had an abscess/wound at an injection site (8% [2/25] vs. 0.29% [1/341] for  
10 those who had not, p=0.013), and having anti-HBc was only associated with having  
11 sought advice from a SH/STI clinic in the preceding year (16% [9/56] vs. 4.2% [13/310]  
12 for those who had not, p=0.002). The use of three types IPEDs was associated with  
13 having anti-HCV: having taken a PDE5i (21% [5/24] vs. 3.2% [11/342] for those who had  
14 not, p=0.002); having injected insulin as IPED (18% [3/17] vs. 3.7% [13/349] for those  
15 who had not, p=0.032); and having injected a less commonly used IPED (17% [3/18] vs.  
16 3.7% [13/348] for those who had not, p=0.037).

17  
18  
19  
20  
21  
22  
23  
24  
25  
26  
27  
28  
29  
30  
31  
32 In total, 47 (12%, 95%CI 9.1%-15%;) were positive for one or more of anti-HIV, anti-HBc  
33 and anti-HCV, with 43 having just one of these markers and four having two or more of  
34 these markers. Two had both anti-HBc and anti-HCV, one of these reported injected  
35 psychoactive drugs, neither reported having had sex with men. One, who reported both  
36 sex with men and injecting psychoactive drugs, had both anti-HIV and anti-HBc; the  
37 remaining participant had all three markers and did not report with either sex with men or  
38 injecting psychoactive drugs.

39  
40  
41  
42  
43  
44  
45  
46  
47  
48 **Uptake of interventions related to the three BBV infections was poor. Overall, only 23%**  
49 **reported receiving a dose of HBV vaccine, 31% ever having a diagnostic HIV test and**  
50 **22% having a HCV test (table 1).**  
51  
52  
53  
54  
55  
56  
57  
58  
59  
60

**Table 3: Factors associated with HIV, hepatitis B and C infection among male injectors of image and performance drugs (IPED).**

|                                                            |                                               | Total                      | Positive |            | Unadjusted odds Ratio with 95% CI |      |       | Adjusted odds Ratio with 95% CI |      |         |
|------------------------------------------------------------|-----------------------------------------------|----------------------------|----------|------------|-----------------------------------|------|-------|---------------------------------|------|---------|
| <b>HIV</b>                                                 |                                               | 395                        | 6        | 1.5%       |                                   |      |       |                                 |      |         |
| Age, years*                                                | Aged<35 or age unknown                        | 287                        | 1        | 0.3%       | 1.0                               |      |       | *                               |      |         |
|                                                            | Aged 35 or over                               | 102                        | 5        | 4.9%       | 14                                | 1.62 | - 122 |                                 |      |         |
|                                                            |                                               | <i>Fisher's Exact Test</i> |          | <i>p</i> = | 0.006                             |      |       |                                 |      |         |
| Gender of sexual partners last year*                       | Male sexual partner                           | 13                         | 3        | 23%        | 38 6.79 - 211                     |      |       |                                 |      |         |
|                                                            | No male partner reported/No sex               | 382                        | 3        | 0.8%       | 1.0                               |      |       |                                 |      |         |
|                                                            |                                               | <i>Fisher's Exact Test</i> |          | <i>p</i> = | 0.001                             |      |       |                                 |      |         |
| Gender of sexual partners last year and Age (in years)     | Male sexual partner                           | 13                         | 3        | 23%        | 85                                | 8.13 | - 893 | 79                              | 4.29 | - 1,450 |
|                                                            | No male partners, aged<35 or age not reported | 285                        | 1        | 0.4%       | 1.0                               |      |       | 1.0                             |      |         |
|                                                            | No male partners, aged 35 or over             | 97                         | 2        | 2.1%       | 6                                 | 0.54 | - 67  | 9                               | 0.59 | - 135   |
|                                                            |                                               | <i>Pearson Chi-Square</i>  |          | <i>p</i> < | 0.001                             |      |       |                                 |      |         |
| Injected illicit other than PIED                           | Yes                                           | 19                         | 2        | 11%        | 11 1.87 - 64                      |      |       | †                               |      |         |
|                                                            | No / Not reported                             | 376                        | 4        | 1.1%       | 1.0                               |      |       |                                 |      |         |
|                                                            |                                               | <i>Fisher's Exact Test</i> |          | <i>p</i> = | 0.029                             |      |       |                                 |      |         |
| Ever had an abscess/sore/open wound at injection site      | Yes                                           | 27                         | 2        | 7.4%       | 7.3 1.27 - 42                     |      |       | 77 3.27 - 1,795                 |      |         |
|                                                            | No / Not sure                                 | 368                        | 4        | 1.1%       | 1.0                               |      |       | 1.0                             |      |         |
|                                                            |                                               | <i>Fisher's Exact Test</i> |          | <i>p</i> = | 0.057                             |      |       |                                 |      |         |
| Taken or used any prescribed medication in last year       | Yes                                           | 111                        | 5        | 4.5%       | 13 1.54 - 116                     |      |       | †                               |      |         |
|                                                            | No / Not sure                                 | 284                        | 1        | 0.4%       | 1.0                               |      |       |                                 |      |         |
|                                                            |                                               | <i>Fisher's Exact Test</i> |          | <i>p</i> = | 0.008                             |      |       |                                 |      |         |
| Sought advice from a sexual health /STI clinic, last year? | Yes                                           | 68                         | 4        | 5.9%       | 10 1.82 - 57                      |      |       | 24 1.03 - 542                   |      |         |
|                                                            | No / Not sure                                 | 327                        | 2        | 0.6%       | 1.0                               |      |       | 1.0                             |      |         |
|                                                            |                                               | <i>Fisher's Exact Test</i> |          | <i>p</i> = | 0.009                             |      |       |                                 |      |         |
| Have you ever been vaccinated against hepatitis B          | Yes                                           | 90                         | 4        | 4.4%       | 7.0 1.27 - 39                     |      |       | †                               |      |         |
|                                                            | No / Not sure                                 | 305                        | 2        | 0.7%       | 1.0                               |      |       |                                 |      |         |
|                                                            |                                               | <i>Fisher's Exact Test</i> |          | <i>p</i> = | 0.026                             |      |       |                                 |      |         |
| Have you ever had a blood test for hepatitis C             | Yes                                           | 81                         | 4        | 4.7%       | 7.6 1.37 - 42                     |      |       | †                               |      |         |
|                                                            | No / Not sure                                 | 308                        | 2        | 0.9%       | 1.0                               |      |       |                                 |      |         |
|                                                            |                                               | <i>Fisher's Exact Test</i> |          | <i>p</i> = | 0.021                             |      |       |                                 |      |         |
| Have you ever had a blood test for HIV?                    | Yes                                           | 122                        | 4        | 3.3%       | 4.6 0.83 - 25                     |      |       | †                               |      |         |
|                                                            | No / Not sure                                 | 273                        | 2        | 0.7%       | 1.0                               |      |       |                                 |      |         |
|                                                            |                                               | <i>Fisher's Exact Test</i> |          | <i>p</i> = | 0.076                             |      |       |                                 |      |         |
| Ever shared needle, syringe or vial                        | Yes                                           | 35                         | 2        | 5.7%       | 5.4 0.95 - 31                     |      |       | †                               |      |         |
|                                                            | No / Not sure                                 | 360                        | 4        | 1.1%       | 1.0                               |      |       |                                 |      |         |
|                                                            |                                               | <i>Fisher's Exact Test</i> |          | <i>p</i> = | 0.091                             |      |       |                                 |      |         |

\* Combined variable was entered into the final multivariate model due to an interaction between age and reporting male sexual partners: with 77% of those with male sexual partners aged over 35 years compared with 25% of those not reporting male sexual partners.

HIV and image &amp; performance enhancing drug use.

17

**Table 3 cont: Factors associated with HIV, hepatitis B and C infection among male injectors of image and performance drugs (IPED).**

|                                                               |                   | Total               | Positive |       | Unadjusted odds ratio with 95% CI |            | Adjusted odds ratio with 95% CI |            |
|---------------------------------------------------------------|-------------------|---------------------|----------|-------|-----------------------------------|------------|---------------------------------|------------|
| <b>Anti-HBc</b>                                               |                   | 395                 | 26       | 6.6%  |                                   |            |                                 |            |
| Sought advice from a sexual health /STI clinic, last year?    | Yes               | 68                  | 10       | 14.7% | 3.4                               | 1.4 – 7.7  | 3.8                             | 1.6 – 8.9  |
|                                                               | No / Not sure     | 327                 | 16       | 4.9%  | 1.0                               |            | 1.0                             |            |
|                                                               |                   | Fisher's Exact Test |          | p=    | 0.006                             |            |                                 |            |
| Subcutaneous injection, last year                             | Yes               | 154                 | 6        | 3.9%  | 1.0                               |            | 1.0                             |            |
|                                                               | No / Not sure     | 241                 | 20       | 8.3%  | 2.2                               | 0.88 – 5.7 | 2.6                             | 0.99 – 6.7 |
|                                                               |                   | Pearson Chi-Square  |          | p=    | 0.085                             |            |                                 |            |
| <b>Anti-HCV</b>                                               |                   | 395                 | 20       | 5.1%  |                                   |            |                                 |            |
| Age, years                                                    | Under25           | 106                 | 4        | 3.8%  | 1.0                               |            |                                 |            |
|                                                               | 25–34             | 134                 | 3        | 2.2%  | 0.58                              | 0.13 – 2.7 |                                 |            |
|                                                               | 35 and over       | 107                 | 10       | 9.3%  | 2.6                               | 0.80 – 8.7 |                                 | †          |
|                                                               | Not reported      | 48                  | 3        | 6.3%  | 1.7                               | 0.37 – 7.9 |                                 |            |
|                                                               |                   | Pearson Chi-Square  |          | p=    | 0.078                             |            |                                 |            |
| Injected illicit other than IPED                              | Yes               | 19                  | 3        | 15.8% | 4.0                               | 1.1 – 15   | 4.4                             | 1.1 – 17.2 |
|                                                               | No / Not reported | 376                 | 17       | 4.5%  | 1.0                               |            | 1.0                             |            |
|                                                               |                   | Fisher's Exact Test |          | p=    | 0.064                             |            |                                 |            |
| Taken or used any prescribed medication, last year            | Yes               | 111                 | 10       | 9.0%  | 2.7                               | 1.1 – 7    |                                 |            |
|                                                               | No / Not sure     | 284                 | 10       | 3.5%  | 1.0                               |            |                                 | †          |
|                                                               |                   | Pearson Chi-Square  |          | p=    | 0.025                             |            |                                 |            |
| Ever had a blood test for hepatitis C                         | Yes               | 85                  | 8        | 9.4%  | 1.7                               | 0.55 – 5.6 |                                 |            |
|                                                               | No                | 221                 | 7        | 3.2%  | 0.5                               | 0.17 – 1.8 |                                 | †          |
|                                                               | Not sure          | 89                  | 5        | 5.6%  | 1.0                               |            |                                 |            |
|                                                               |                   | Pearson Chi-Square  |          | p=    | 0.080                             |            |                                 |            |
| Taken Phosphodiesterase type 5 inhibitors ("Viagra / Cialis") | Yes               | 26                  | 5        | 19%   | 5.6                               | 1.9 – 17   | 6.0                             | 1.9 – 18   |
|                                                               | No                | 369                 | 15       | 4.1%  | 1.0                               |            | 1.0                             |            |
|                                                               |                   | Fisher's Exact Test |          | p=    | 0.007                             |            |                                 |            |
| Injected insulin (as IPED)                                    | Yes               | 22                  | 4        | 18%   | 5.0                               | 1.5 – 16   |                                 |            |
|                                                               | No                | 373                 | 16       | 4.3%  | 1.0                               |            |                                 | †          |
|                                                               |                   | Fisher's Exact Test |          | p=    | 0.019                             |            |                                 |            |
| Other injected IPED (incl. EPO, IGF-1 and Nubain)             | Yes               | 20                  | 3        | 15%   | 3.7                               | 0.99 – 14  |                                 |            |
|                                                               | No                | 375                 | 17       | 4.5%  | 1.0                               |            |                                 | †          |
|                                                               |                   | Fisher's Exact Test |          | p=    | 0.073                             |            |                                 |            |
| Ever shared needle, syringe or drug vial                      | Yes               | 35                  | 4        | 11%   | 2.8                               | 0.87 – 8.8 |                                 |            |
|                                                               | No / Not sure     | 360                 | 16       | 4%    | 1.0                               |            |                                 | †          |
|                                                               |                   | Fisher's Exact Test |          | p=    | 0.090                             |            |                                 |            |

† Not in final model.

Key. STI: sexually transmitted infection; EPO: erythropoietin; IGF-1: insulin-like growth factor 1; Nubain: nalbuphine hydrochloride.

## DISCUSSION

IPED injectors are at risk of infection with HIV as well as other BBVs. This is the first prevalence study to have found HIV among IPED injectors, with the prevalence at 1.5%, similar to that found among injectors of psychoactive drugs in England and Wales (1.2%,

HIV and image & performance enhancing drug use.

18

1  
2  
3  
4  
5  
6  
7  
8  
9  
10  
11  
12  
13  
14  
15  
16  
17  
18  
19  
20  
21  
22  
23  
24  
25  
26  
27  
28  
29  
30  
31  
32  
33  
34  
35  
36  
37  
38  
39  
40  
41  
42  
43  
44  
45  
46  
47  
48  
49  
50  
51  
52  
53  
54  
55  
56  
57  
58  
59  
60

2011[40]). However, anti-HBc and anti-HCV – at 8.8% and 5.5% respectively – are lower than among psychoactive drug injectors (16% and 43% respectively, 2011 [40]). The prevalence of all three BBVs in this sample would appear to be higher than that found in the general UK population.[41,42] Once those who reported either sex with men or injecting psychoactive drugs were excluded, 10% had been infected with one or more of HIV, hepatitis B and hepatitis C.

It is important to consider the limitations of this study. The comparative rarity, marginalisation and illicit nature of injecting drug use impede the construction of a sampling frame, making the representativeness of our sample impossible to measure. This study used an established methodology for recruiting PWID through specialist services;[26,27] however, the robustness of this approach for IPED injectors is unknown and cannot currently be assessed due to the very limited knowledge on the size and nature of this group.[3,5] The use of NSP to access this group was a pragmatic approach; community based recruitment approaches, such as Respondent Driven Sampling and Time-Location Sampling, that are often advocated for hard to reach populations[43] are possible alternatives. However, these are likely to be difficult to implement with this group due to the diversity of the drugs used, the clandestine and close-knit nature of this group and because use usually takes place in private settings (such as homes or gyms).[3,5] The findings here also rely on self-reported behaviours – though their reliability has not been assessed among IPED users, these have been found to be reliable for psychoactive drug injectors[44,45] - and infection with BBVs has been determined by laboratory-based biological data from the testing of oral-fluid samples. Whilst oral-fluid testing is highly sensitive for anti-HIV, the sensitivity is reduced for anti-HCV and anti-HBc.[39] Whilst this study is the largest of BBVs in this population, the sample size still restricts its power, and consequently caution is needed when attempting to generalise these findings to the wider population of IPED injectors.

HIV and image & performance enhancing drug use.

19

1  
2  
3  
4  
5  
6 The levels of HIV and anti-HBc are both higher than in the only previous UK study to  
7 measure these in IPED injectors. Undertaken >10 years ago using a similar  
8 methodology, this found no HIV and an anti-HBc prevalence of 2%.[20] suggesting that  
9 the prevalence of these infections among IPED injectors *might* have increased over time.  
10 Exposure to BBVs among IPED injectors appears to be associated with sexual risks and  
11 the injection of psychoactive drugs; although *injecting* psychoactive drugs is rare among  
12 IPED injectors, unprotected sex with multiple partners is common. The sharing of  
13 injecting equipment or drug vials among IPED injectors at 8.9% is much less common  
14 than among injectors of psychoactive drugs (in 2011, 37% of psychoactive drug injectors  
15 reported recently sharing injecting equipment[40]). Though exposure was not associated  
16 with sharing in the multivariate analyses in this study, BBV transmission through IPED  
17 injection cannot be excluded as this study may have lacked sufficient power to detect  
18 this.  
19  
20  
21  
22  
23  
24  
25  
26  
27  
28  
29  
30  
31  
32  
33

34 The associations between having HIV and the use of SH/STI clinics and having male  
35 sexual partners, suggest that HIV transmission among IPED injectors might be related to  
36 sexual activity. This association may reflect AS use by some HIV positive gay and  
37 bisexual men to mask the longer-term effects of HIV infection.[35] The association with  
38 having an abscess/wound at the injection site probably reflects the greater vulnerability of  
39 PWID with HIV to injection related bacterial infections.[46,47] The association between  
40 exposure to HBV and having obtained advice from a SH/STI clinic is again suggestive of  
41 a role for sexual risk in infection, particularly as sexual transmission is the main route by  
42 which the HBV is now acquired within the UK.[48] The association between having anti-  
43 HBc and not injecting subcutaneously suggests that certain patterns of IPED use might  
44 be related to increased risk; as some IPED are only injected subcutaneously and others  
45 only intramuscularly, and many users take several types.[3,8,12,13,14] Exposure to  
46  
47  
48  
49  
50  
51  
52  
53  
54  
55  
56  
57  
58  
59  
60

HIV and image & performance enhancing drug use.

20

1  
2  
3  
4  
5  
6  
7  
8  
9  
10  
11  
12  
13  
14  
15  
16  
17  
18  
19  
20  
21  
22  
23  
24  
25  
26  
27  
28  
29  
30  
31  
32  
33  
34  
35  
36  
37  
38  
39  
40  
41  
42  
43  
44  
45  
46  
47  
48  
49  
50  
51  
52  
53  
54  
55  
56  
57  
58  
59  
60

HCV, however, would appear to be associated with the injection of psychoactive drugs – an association that has been previously noted[6] - this finding might reflect more frequent injecting in this sub-group. Sexual activity may also play a role, assuming that the use of PDE5i is related to improving or maintaining sexual performance. These associations all require further investigation.

The level sharing found here was in-line with previous studies of injecting risk among IPED users.[20,28,29,30,32,33,35] The association between sharing and subcutaneous injection, suggests that sharing – like HBV exposure – may be associated with certain patterns of IPED use. As in previous studies of IPED injectors, sexual activity was common, and condom use was poor.[20,28,34] Condom use was higher among those with male sexual partners, and lower among those who reported snorting cocaine. The more frequent use of condoms by gay and bisexual men probably reflects awareness of their increased HIV risk.[42] The association with cocaine use might possibly be related to its use as a sexual stimulant, with this possibly related to attempts to counteract the reduced libido experienced on discontinuation of AS use or in the periods between courses of AS use ('off-cycles').[14] In part, this effect may be as a result of the decrease in endogenous testosterone production,[49] and is why IPEDs users self-treat with human chorionic gonadotrophin in an attempt to stimulate endogenous production, with PDE5i used to symptomatically treat erectile dysfunction.[5, 14,50] Increased libido following AS administration is also reported by users[14,33,34,51] with similar effects being reported following the use of drugs such as melanotan-II.[12]

Associations were found between psychoactive drug use and both sharing and poor condom use. IPED users who also use psychoactive drugs may be a higher risk – or perhaps less risk averse - sub-group. Whilst this needs further investigation, it suggests – considering the substantial levels of psychoactive drug use found here and in previous



HIV and image & performance enhancing drug use.

21

studies[6,8,28,35,36] – that those using both IPED and psychoactive drugs should be an important target group for harm reduction interventions.

This study indicates that those providing services to PWID – particularly NSPs, outreach services and General Practitioners - should be alert to the needs of those who use IPEDs. In particular, they need to be aware of the range drugs that may be used by this group and of the associated injecting practices as these differ from those of psychoactive drug injectors. Considering the BBV prevalence and levels risk found specialist services for PWID need to both engage with IPED users and ensure that they have access to appropriate injecting equipment and targeted harm reduction advice. They should also ensure that this group has access to testing for BBVs, hepatitis B vaccinations, sexual health services, and condoms.

Our findings suggest that sexual risk and the use, and particularly the injection, of psychoactive drugs are possibly the most important factors associated with BBV transmission among IPED injectors. The transmission of HIV and other BBV through the injecting of IPED cannot be excluded, and this is certainly possible as equipment sharing does occur. However, this study largely recruited through NSP providing injecting equipment and advice. IPED injectors not in contact with NSP may have a different risk profile and so infection risk. Even so, our findings suggest the need for targeted interventions to address sexual health needs, psychoactive drug use, and the injection practices among IPED injectors. Considering the limitations of this study, a larger study recruiting from a wider range of settings and collecting dried-blood samples is needed to more fully examine prevalence and, in particular, the associated risk factors, and so the role of IPED injection in transmission of HIV and other BBVs.

HIV and image & performance enhancing drug use.

22

**Acknowledgements:** We are grateful to all of the people who inject image and performance enhancing drugs who have taken part in the survey and to the various services across the England and Wales who assisted with their recruitment. We would like to thank the support staff who worked on the survey and those who undertook the laboratory work. The survey is undertaken by the Health Protection Agency which is funded through the Department of Health.

*Contributions:* All authors contributed to the writing of the paper, with writing and analyses led by VH. MEB, AK, JM, AM and VH developed the modified questionnaire used with IPED injectors. AM undertook the day-to-day co-ordination the survey of IPED injectors, with support from MEB and VH. The on-going monitoring survey is managed by VH and FN. Development of the laboratory tests and processes employed was led by JP, who managed their application to this study.

*Funding.* This research received no specific grant from any funding agency in the public, commercial or not-for-profit sectors.

*Competing interests.* None.

## References

- 1 Aceijas C, Stimson GV, Hickman M, *et al*. Global overview of injecting drug use and HIV infection among injecting drug users. *AIDS*. 2004;**18**(17):2295–303.
- 2 Nelson PK, Mathers BM, Cowie B, *et al*. Global epidemiology of hepatitis B and hepatitis C in people who inject drugs: results of systematic reviews. *The Lancet*. 2011;**378**(9791):571–83.
- 3 Evans-Brown M, McVeigh J, Perkins C, Bellis MA. Human Enhancement Drugs: The Emerging Challenges to Public Health. Liverpool, North West Public Health Observatory, April 2012. ISBN: 978-1-908929-01-3
- 4 McVeigh J, Evans-Brown M, Bellis MA. Human enhancement drugs and the pursuit of perfection. *Adicciones*. 2012;**24**(3):185–90.
- 5 Advisory Council on the Misuse of Drugs. Consideration of the anabolic steroids. Home Office; 2010 September.
- 6 Iversen J, Topp L, Wand H, Maher L. Are people who inject performance and image-enhancing drugs an increasing population of Needle and Syringe Program attendees? *Drug Alcohol Rev*. 2012 Aug 29. doi: 10.1111/j.1465-3362.2012.00499.x.
- 7 Aitken C, Cheryl D, Kay S. Pumping iron, risking infection? Exposure to hepatitis C, hepatitis B and HIV among anabolic-androgenic steroid injectors in Victoria, Australia. *Drug Alcohol Depend*. 2002;**65**(3):303–8.
- 8 Larance B, Degenhardt L, Copeland J, Dillon P. Injecting risk behaviour and related harm among men who use performance- and image-enhancing drugs. *Drug Alcohol Rev*. 2008;**27**(6):679–86.
- 9 Christiansen AV. Testing citizens training recreationally in gyms. In: McNamee M, Møller V, editors. Doping and anti-doping policy in sport. Abingdon: Routledge; 2011. p. 126–41.
- 10 Mulcahey MK, Schiller JR, Hulstyn MJ. Anabolic steroid use in adolescents: identification of those at risk and strategies for prevention. *Phys Sportsmed*. 2010;**38**(3):105–13..
- 11 Castillo Castillo EM, Comstock RD. Prevalence of use of performance-enhancing substances among United States adolescents. *Pediatr Clin North Am*. 2007;**54**(4):663–75
- 12 Evans Evans-Brown M, Dawson RT, Chandler M, McVeigh J. Use of melanotan I and II in the general population. *BMJ*. 2009;**338**:b566.
- 13 Evans-Brown M, McVeigh J. Injecting human growth hormone as a performance-enhancing drug—perspectives from the United Kingdom. *J Subst Use*. 2009;**14**(5):267–88.
- 14 Llewellyn W. William Llewellyn's anabolics. 10 ed. Jupiter (FL): Molecular Nutrition; 2010.
- 15 Marquis CP, Maffulli N. Anabolic steroid related abscess—a risk worth taking? *Inj Extra*. 2006;**37**(12):451–4.
- 16 Gautschi OP, Zellweger R. Images in clinical medicine. Methicillin-resistant *Staphylococcus aureus* abscess after intramuscular steroid injection. *N Engl J Med*. 2006;**355**(7):713.
- 17 Dunn F. Two cases of biceps injury in bodybuilders with initially misleading presentation. *Emerg Med J*. 2002 Sep 1;**19**(5):461–2.
- 18 Al Al-Ismail K, Torreggiani WC, Munk PL, Nicolaou S. Gluteal mass in a bodybuilder: radiological depiction of a complication of anabolic steroid use. *Eur Radiol*. 2002 Jun 1;**12**(6):1366–9.
- 19 Evans NA. Local complications of self administered anabolic steroid injections. *Br J Sports Med*. 1997;**31**(4):349–50.
- 20 Crampin AC, Lamagni TL, Hope VD, *et al*. The risk of infection with HIV and hepatitis B in individuals who inject steroids in England and Wales. *Epidemiol Infect*. 1998;**121**(2):381–6.
- 21 Day CA, Topp L, Iversen J, Maher L, Collaboration of Australian NSPs. Blood-borne virus prevalence and risk among steroid injectors: results from the Australian Needle and Syringe Program

1  
2  
3  
4  
5  
6  
7  
8  
9  
10  
11  
12  
13  
14  
15  
16  
17  
18  
19  
20  
21  
22  
23  
24  
25  
26  
27  
28  
29  
30  
31  
32  
33  
34  
35  
36  
37  
38  
39  
40  
41  
42  
43  
44  
45  
46  
47  
48  
49  
50  
51  
52  
53  
54  
55  
56  
57  
58  
59  
60

Survey. *Drug Alcohol Rev.* 2008;**27**(5):559–61.

22 Henrion R, Mandelbrot L, Delfieu D. Contamination par le VIH a la suite d'injections d'anabolisants. *Presse Med.* 1992;**21**(5):218.

23 Scott MJ, Scott MJ. HIV infection associated with injections of anabolic steroids. *JAMA.* 1989;**262**(2):207–8.

24 Rich JD, Dickinson BP, Merriman NA, Flanigan TP. Hepatitis C virus infection related to anabolic-androgenic steroid injection in a recreational weight lifter. *Am J Gastroenterol.* 1998;**93**(9):1598.

25 Sklarek HM, Mantovani RP, Erens E, *et al.* AIDS in a bodybuilder using anabolic steroids. *N Engl J Med.* 1984;**311**(26):1701.

26 Hope VD, Judd A, Hickman M, *et al.* HIV prevalence among injecting drug users in England and Wales 1990 to 2003: evidence for increased transmission in recent years. *AIDS.* 2005;**19**(11):1207–14.

27 Hope VD, Rogers PA, Jordan L, *et al.* Sustained increase in the sharing of needles and syringes among drug users in England and Wales. *AIDS.* 2002;**16**(18):2494–6.

28 Korkia P, Stimson G. Anabolic steroid use in Great Britain: An exploratory investigation. Final report to the Department of Health for England, Scotland and Wales. The Centre for Research on Drugs and Health Behaviour; 1993 Oct.

29 Lenehan P, Bellis MA, McVeigh J. A study of anabolic steroid use in the North West of England. *J Perform Enhanc Drugs.* 1996;**1**(2):57–70.

30 Pates R, Barry C. Steroid use in Cardiff: A problem for whom? *J Perform Enhanc Drugs.* 1996;**1**(3):92–7.

31 Burton C. Anabolic steroid use among the gym population in Clwyd. *Pharm J.* 1996;256:557–9.

32 Midgley S, Heather N, Best D, *et al.* Risk behaviours for HIV and hepatitis infection among anabolic-androgenic steroid users. *AIDS Care.* 2000;**12**(2):163–70.

33 Grace FM, Baker JS, Davies B. Anabolic androgenic steroid use in recreational gym users: a regional sample of the Mid-Glamorgan area. *J Subst Use.* 2001;**6**(3):189–95.

34 Bolding G, Sherr L, Maguire M, Elford J. HIV risk behaviours among gay men who use anabolic steroids. *Addiction.* 1999;**94**(12):1829–35.

35 Bolding G, Sherr L, Elford J. Use of anabolic steroids and associated health risks among gay men attending London gyms. *Addiction.* 2002;**97**(2):195–203.

36 Ip EJ, Barnett MJ, Tenerowicz MJ, Perry PJ. The anabolic 500 survey: characteristics of male users versus nonusers of anabolic-androgenic steroids for strength training. *Pharmacotherapy.* 2011;**31**(8):757–66.

37 Noone A, Durante AJ, Brady AR, *et al.* HIV infection in injecting drug users attending centres in England and Wales, 1990-1991. *AIDS.* 1993;**7**(11):1501–7.

38 Connell JA, Parry JV, Mortimer PP, Duncan J. Novel assay for the detection of immunoglobulin G antihuman immunodeficiency virus in untreated saliva and urine. *J Med Virol* 1993;**41**(2):159–64.

39 Judd A, Parry J, Hickman M, *et al.* Evaluation of a modified commercial assay in detecting antibody to hepatitis C virus in oral fluids and dried blood spots. *J Med Virol.* 2003;**71**(1):49–55.

40 Health Protection Agency, Health Protection Services and Microbiology Services. Unlinked Anonymous Monitoring Survey of People Who Inject Drugs in contact with specialist services: data tables. London: Health Protection Agency. 2012 July.

41 European Centre for Disease Prevention and Control. Hepatitis B and C in the EU neighbourhood: prevalence, burden of disease and screening policies. Stockholm: European Centre for Disease Prevention and Control; 2010 Sep.  
[www.ecdc.europa.eu/en/publications/Publications/TER\\_100914\\_Hep\\_B\\_C%20\\_EU\\_neighbourhood](http://www.ecdc.europa.eu/en/publications/Publications/TER_100914_Hep_B_C%20_EU_neighbourhood).

HIV and image & performance enhancing drug use.

25

pdf

42 Health Protection Agency. HIV in the United Kingdom: 2012 Report. Health Protection Services, Colindale; 2012 Nov.

43 Magnani R, Sabin K, Saidel T, Heckathorn D. Review of sampling hard-to-reach and hidden populations for HIV surveillance. *AIDS*. 2005;**19** Suppl 2:S67–72.

44 Latkin CA, Vlahov D, Anthony JC. Socially desirable responding and self-reported HIV infection risk behaviors among intravenous drug users. *Addiction*. 1993;**88**(4):517–26.

45 De Irala J, Bigelow C, McCusker J, *et al*. Reliability of self-reported human immunodeficiency virus risk behaviors in a residential drug treatment population. *Am J Epidemiol*. 1996;**143**(7):725–32.

46 Lloyd-Smith E, Kerr T, Hogg RS, *et al*. Prevalence and correlates of abscesses among a cohort of injection drug users. *Harm Reduct J*. 2005;**2**:24.

47 Spijkerman IJ, van Ameijden EJ, Mientjes GH, *et al*. Human immunodeficiency virus infection and other risk factors for skin abscesses and endocarditis among injection drug users. *J Clin Epidemiol*. 1996;**49**(10):1149–54.

48 Health Protection Agency, Health Protection Scotland, Public Health Wales, Public Health Agency Northern Ireland. Shooting Up: infections among people who inject drugs in the UK 2011. London: Health Protection Agency; 2012 Nov.

49 Grimes DA, Lopez LM, Gallo MF, *et al*. Steroid hormones for contraception in men. *Cochrane Database Syst Rev*. 2007;(2):CD004316.

50 Evans-Brown M, McVeigh J. Anabolic steroid use in the general population of the United Kingdom. In: Møller V, McNamee MJ, Dimeo P, editors. Elite sport, doping and public health. Syddansk: University Press of Southern Denmark; 2009. p. 75–97.

51 Bahrke MS, Yesalis CE. Abuse of anabolic androgenic steroids and related substances in sport and exercise. *Curr Opin Pharmacol*. 2004;**1**;4(6):614–20.
